# Supplementary material for: Highly efficient ultralong organic phosphorescence induced by lone pair repulsions and noncovalent interactions
Source: Royal Society of Chemistry journal article supplement (doi:10.1039/d2nj02414d), 2022-01-01
Supplement: d2nj02414d1.pdf [file d2nj02414d1.pdf]

# Supporting information

## Highly Efficient Ultralong Organic Phosphorescence Induced by Lone Pair Repulsions and Noncovalent Interactions

Mingxue Yang<sup>a, b</sup>, Pei Wang<sup>a, b</sup>, Xu-Lin Chen<sup>\*a, b</sup> and Can-Zhong Lu<sup>\*a, b, c</sup>

<sup>a</sup> CAS Key Laboratory of Design and Assembly of Functional Nanostructures, Fujian Provincial Key Laboratory of Nanomaterials, Fujian Institute of Research on the Structure of Matter, Chinese Academy of Sciences, Fuzhou, Fujian 350002, China

<sup>b</sup> Xiamen Institute of Rare Earth Materials, Fujian Institute of Research on the Structure of Matter, Chinese Academy of Sciences, Xiamen, Fujian 361021, China

<sup>c</sup> University of Chinese Academy of Sciences, Beijing 100049, China

## Content

|                                                                                                                                 |    |
|---------------------------------------------------------------------------------------------------------------------------------|----|
| 1. Synthetic schemes of Materials.....                                                                                          | 3  |
| <b>Scheme S1</b> Synthetic route of 1,2-difluoro-3-iodobenzene.....                                                             | 3  |
| <b>Scheme S2</b> Synthetic route of 9-(2,3-difluorophenyl)-9H-carbazole.....                                                    | 3  |
| <b>Scheme S3</b> Synthetic route of 9-(2,3-bis((2-bromophenyl)thio)phenyl)-9H-carbazole<br>( <b>BrDBTCz</b> ).....              | 3  |
| 2. NMR Spectra.....                                                                                                             | 4  |
| <b>Figure S1</b> <sup>1</sup> H NMR spectrum of 9-(2,3-difluorophenyl)-9H-carbazole.....                                        | 4  |
| <b>Figure S2</b> <sup>1</sup> H NMR spectrum of 9-(2,3-bis((2-bromophenyl)thio)phenyl)-9H-carbazole<br>( <b>BrDBTCz</b> ).....  | 4  |
| 3. Single Crystals Analysis.....                                                                                                | 5  |
| <b>Table S1</b> Single crystals data for <b>BrDBTCz</b> .....                                                                   | 5  |
| <b>Table S2</b> Bond lengths for <b>BrDBTCz</b> .....                                                                           | 5  |
| <b>Table S3</b> Bond angles for <b>BrDBTCz</b> .....                                                                            | 6  |
| 4. UV-Vis Analysis and Thermogravimetry.....                                                                                    | 7  |
| <b>Figure S3</b> (a) UV-vis absorption spectrum of <b>BrDBTCz</b> in 2-MeTHF solution; (b) TGA curve of<br><b>BrDBTCz</b> ..... | 7  |
| 5. Photophysical Properties.....                                                                                                | 7  |
| <b>Figure S4</b> Time-resolved fluorescence decay curves of crystalline <b>BrDBTCz</b> at 298K.....                             | 7  |
| <b>Table S4</b> Photoluminescence lifetimes and percentages (A) of crystalline <b>BrDBTCz</b> under<br>ambient conditions.....  | 8  |
| <b>Figure S5</b> Time-resolved emission decay curves of <b>BrDBTCz</b> in a diluted 2-MeTHF solution at<br>77 K.....            | 8  |
| <b>Figure S6</b> Time-resolved emission decay curves at 77 K of <b>BrDBTCz</b> in diluted 2-MeTHF<br>solution.....              | 9  |
| <b>Table S5</b> Photoluminescence lifetimes of <b>BrDBTCz</b> in the solution of 2-MeTHF at 77 K.....                           | 10 |
| <b>Table S6</b> Photophysical parameters of crystalline <b>BrDBTCz</b> under the excitation of 400 nm at                        |    |

|                                                                                                                                                                                                                                                                                                      |    |
|------------------------------------------------------------------------------------------------------------------------------------------------------------------------------------------------------------------------------------------------------------------------------------------------------|----|
| 298 K .....                                                                                                                                                                                                                                                                                          | 10 |
| 6. Data for reference compound .....                                                                                                                                                                                                                                                                 | 11 |
| <b>Figure S7</b> A list of the reported non-doped pure organic phosphors with phosphorescent quantum yield over 10%, in which the phosphorescent quantum yield ( $F_p$ ), intersystem crossing constant ( $k_{ISC}$ ) and the reference of each molecule was noted underneath, correspondingly ..... | 11 |
| <b>Figure S8</b> The diagram of the reported non-doped pure organic phosphors with phosphorescent quantum yield over 10%, in which the names are identical to that in <b>Figure S1</b> .....                                                                                                         | 12 |
| 7. Theoretical Calculation .....                                                                                                                                                                                                                                                                     | 13 |
| <b>Table S8</b> Energy level of HOMO, LUMO and their bandgap of monomer and dimer <b>BrDBTCz</b> .....                                                                                                                                                                                               | 14 |
| <b>Table S9</b> Component analysis of the excited-state <b>BrDBTCz</b> monomer .....                                                                                                                                                                                                                 | 15 |
| <b>Table S10</b> Component analysis of the excited-state <b>BrDBTCz</b> configured as dimer 1.....                                                                                                                                                                                                   | 16 |
| <b>Table S11</b> Component analysis of the excited-state <b>BrDBTCz</b> configured as dimer 2.....                                                                                                                                                                                                   | 18 |
| <b>Table S12</b> Component analysis of the excited-state <b>BrDBTCz</b> configured as dimer 3.....                                                                                                                                                                                                   | 20 |
| <b>Table S13</b> Component analysis of the excited-state <b>BrDBTCz</b> configured as dimer 4.....                                                                                                                                                                                                   | 22 |
| <b>Table S14</b> Component analysis of the excited-state <b>BrDBTCz</b> configured as dimer 5.....                                                                                                                                                                                                   | 24 |
| <b>Table S15</b> Component analysis of the excited-state <b>BrDBTCz</b> configured as dimer 6.....                                                                                                                                                                                                   | 26 |

## 1. Synthetic schemes of Materials

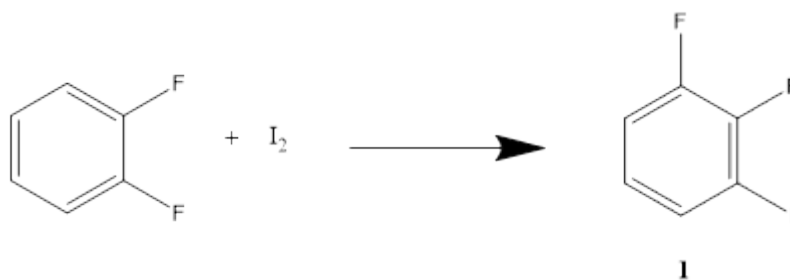

**Scheme S1** Synthetic route of 1,2-difluoro-3-iodobenzene

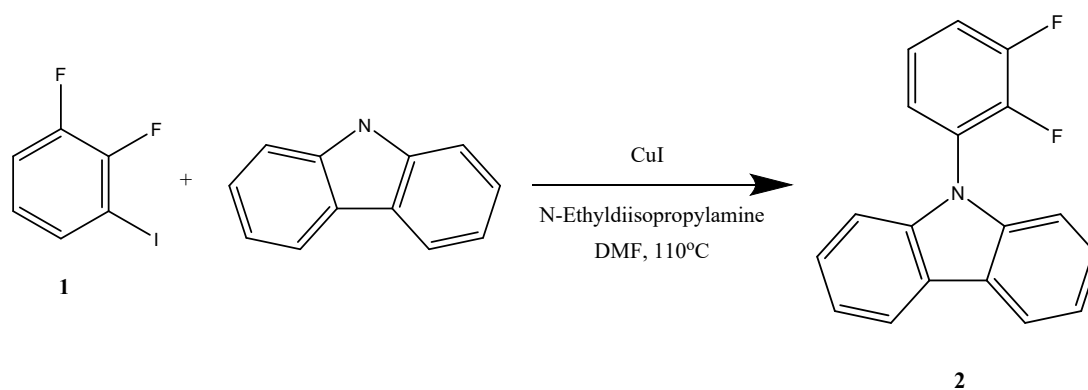

**Scheme S2** Synthetic route of 9-(2,3-difluorophenyl)-9H-carbazole

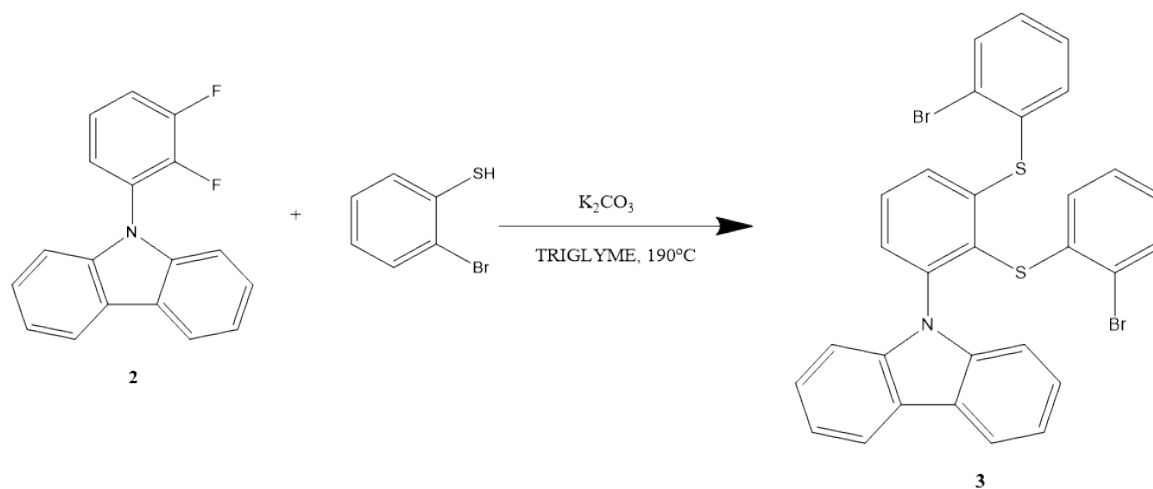

**Scheme S3** Synthetic route of 9-(2,3-bis((2-bromophenyl)thio)phenyl)-9H-carbazole (**BrDBTCz**)

## 2. NMR Spectra

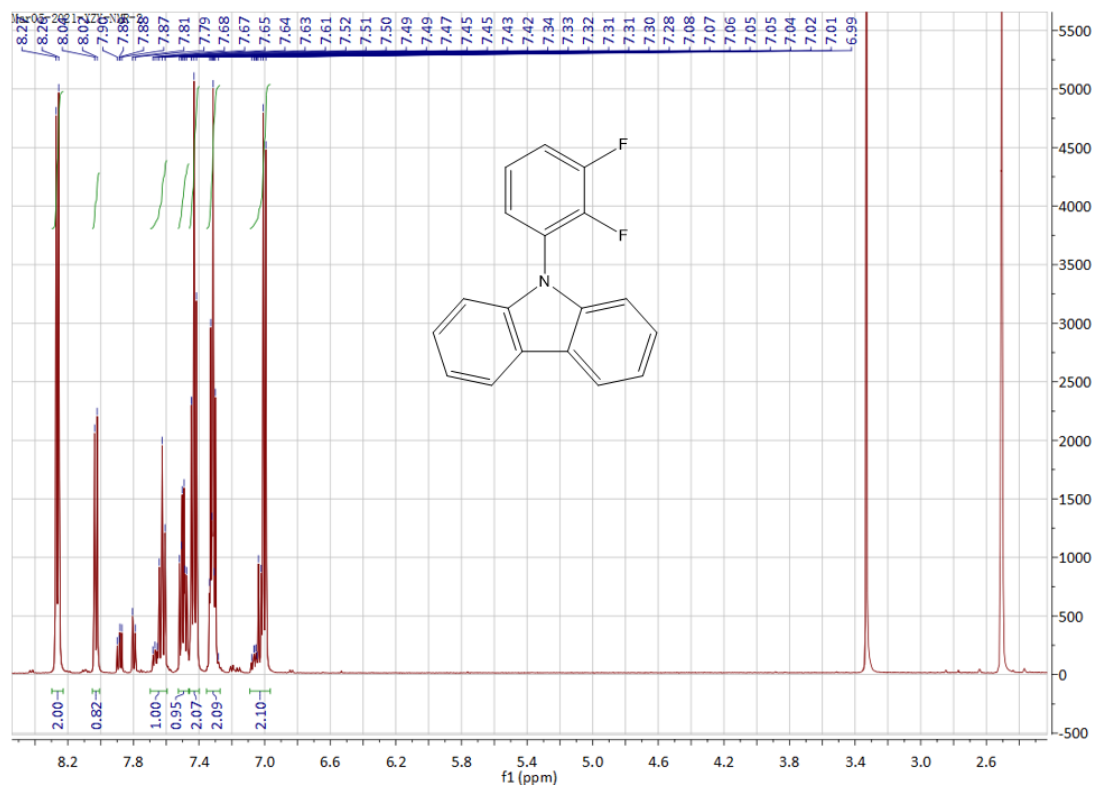

Figure S1 <sup>1</sup>H NMR spectrum of 9-(2,3-difluorophenyl)-9H-carbazole

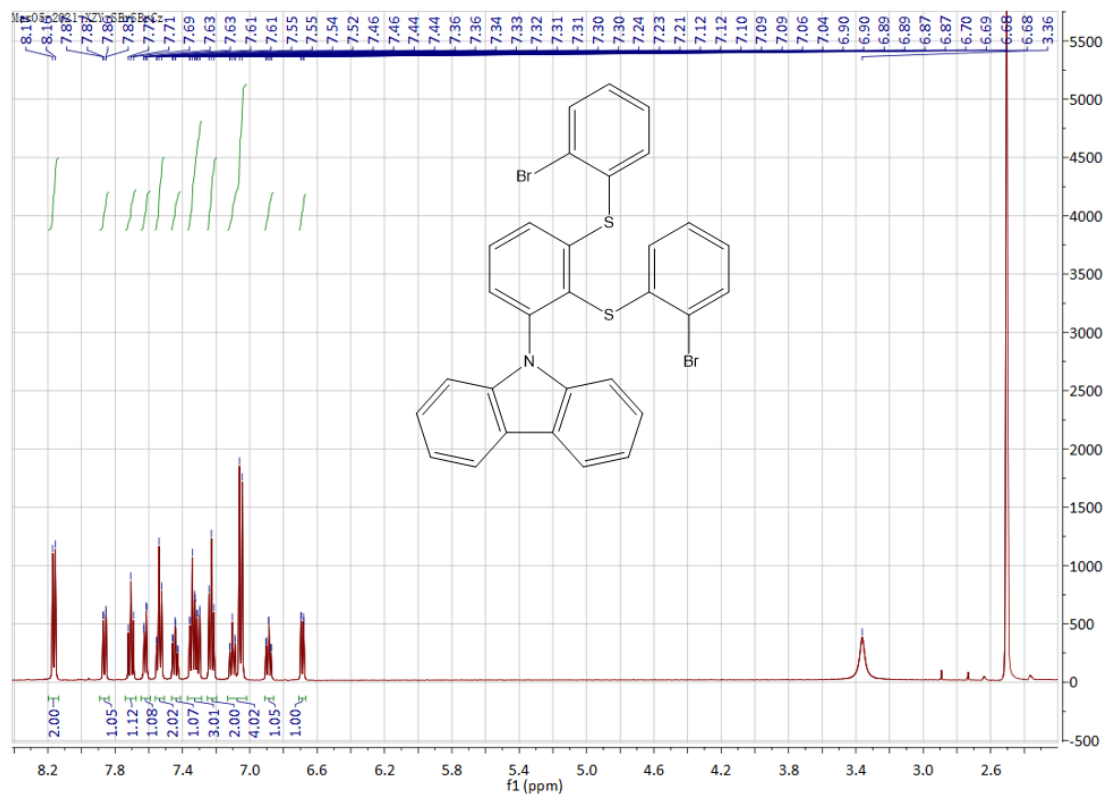

Figure S2 <sup>1</sup>H NMR spectrum of 9-(2,3-bis((2-bromophenyl)thio)phenyl)-9H-carbazole (BrDBTCz)

### 3. Single Crystals Analysis

**Table S1** Single crystals data for **BrDBTCz**

| Empirical formula                                   | $C_{30}H_{19}Br_2NS_2$ |
|-----------------------------------------------------|------------------------|
| Formula weight                                      | 617.40                 |
| Temperature/K                                       | 200.0                  |
| Crystal system                                      | triclinic              |
| Space group                                         | <i>P</i> -1            |
| <i>a</i> / Å                                        | 9.2405(6)              |
| <i>b</i> / Å                                        | 10.8311(8)             |
| <i>c</i> / Å                                        | 13.7741(8)             |
| $\alpha$ / °                                        | 93.965(2)              |
| $\beta$ / °                                         | 95.341(2)              |
| $\gamma$ / °                                        | 114.128(2)             |
| <i>V</i> / Å <sup>3</sup>                           | 1243.93(14)            |
| <i>Z</i>                                            | 2                      |
| $\rho_{\text{calc}}$ g/cm <sup>3</sup>              | 1.648                  |
| $\mu$ / mm <sup>-1</sup>                            | 3.447                  |
| <i>F</i> (000)                                      | 616.0                  |
| Crystal size / mm <sup>3</sup>                      | 0.192 × 0.164 × 0.09   |
| <i>R</i> <sub>int</sub>                             | 0.0665                 |
| <i>GOOF</i> on <i>F</i> <sup>2</sup>                | 1.043                  |
| <i>R</i> <sub>1</sub> [ <i>I</i> ≥ 2σ( <i>I</i> )]  | 0.0413                 |
| <i>wR</i> <sub>2</sub> [ <i>I</i> ≥ 2σ( <i>I</i> )] | 0.0928                 |

**Table S2** Bond lengths for **BrDBTCz**

| Atom | Atom | Length/Å | Atom | Atom | Length/Å | Atom | Atom | Length/Å |
|------|------|----------|------|------|----------|------|------|----------|
| Br01 | C00H | 1.892(3) | C00E | C00H | 1.383(4) | C008 | C00K | 1.385(5) |
| Br02 | C008 | 1.900(3) | C00E | C00N | 1.410(4) | C009 | C00P | 1.394(4) |
| S003 | C006 | 1.773(3) | C00F | C00J | 1.412(4) | C00A | C00B | 1.377(4) |
| S003 | C009 | 1.770(3) | C00F | C00L | 1.380(5) | C00B | C00I | 1.388(4) |
| S004 | C007 | 1.768(3) | C00G | C00J | 1.441(5) | C00C | C00I | 1.387(4) |
| S004 | C00E | 1.772(3) | C00G | C00U | 1.395(5) | C00D | C00G | 1.409(4) |
| N005 | C00C | 1.422(4) | C00H | C00O | 1.385(4) | C00D | C00Q | 1.388(5) |
| N005 | C00D | 1.387(4) | C00J | C00W | 1.401(5) | C00P | C00T | 1.382(5) |
| N005 | C00F | 1.396(4) | C00K | C00R | 1.377(5) | C00Q | C00V | 1.388(5) |
| C006 | C007 | 1.407(4) | C00L | C00Y | 1.389(5) | C00R | C00T | 1.368(5) |
| C006 | C00C | 1.400(4) | C00M | C00O | 1.379(5) | C00U | C00X | 1.369(5) |
| C007 | C00A | 1.391(4) | C00M | C00S | 1.378(5) | C00V | C00X | 1.400(5) |
| C008 | C009 | 1.386(4) | C00N | C00S | 1.373(4) | C00W | C00Z | 1.369(6) |

**Table S3** Bond angles for BrDBTCz

| Atom | Atom | Atom | Angle/°    | Atom | Atom | Atom | Angle/°  |
|------|------|------|------------|------|------|------|----------|
| C009 | S003 | C006 | 102.44(14) | C00L | C00F | N005 | 129.2(3) |
| C007 | S004 | C00E | 103.44(14) | C00L | C00F | C00J | 122.5(3) |
| C00D | N005 | C00C | 125.5(3)   | C00D | C00G | C00J | 106.8(3) |
| C00D | N005 | C00F | 108.8(2)   | C00U | C00G | C00D | 118.9(3) |
| C00F | N005 | C00C | 125.6(3)   | C00U | C00G | C00J | 134.3(3) |
| C007 | C006 | S003 | 121.8(2)   | C00E | C00H | Br01 | 120.7(2) |
| C00C | C006 | S003 | 119.1(2)   | C00E | C00H | C00O | 121.3(3) |
| C00C | C006 | C007 | 119.0(3)   | C00O | C00H | Br01 | 118.1(2) |
| C006 | C007 | S004 | 117.7(2)   | C00C | C00I | C00B | 119.5(3) |
| C00A | C007 | S004 | 122.8(2)   | C00F | C00J | C00G | 107.1(3) |
| C00A | C007 | C006 | 119.5(3)   | C00W | C00J | C00F | 118.5(3) |
| C009 | C008 | Br02 | 120.4(2)   | C00W | C00J | C00G | 134.4(3) |
| C00K | C008 | Br02 | 117.9(3)   | C00R | C00K | C008 | 119.3(3) |
| C00K | C008 | C009 | 121.7(3)   | C00F | C00L | C00Y | 117.3(3) |
| C008 | C009 | S003 | 120.2(2)   | C00S | C00M | C00O | 119.9(3) |
| C008 | C009 | C00P | 117.7(3)   | C00S | C00N | C00E | 120.7(3) |
| C00P | C009 | S003 | 122.1(2)   | C00M | C00O | C00H | 119.9(3) |
| C00B | C00A | C007 | 120.7(3)   | C00T | C00P | C009 | 120.7(3) |
| C00A | C00B | C00I | 120.6(3)   | C00V | C00Q | C00D | 117.4(3) |
| C006 | C00C | N005 | 120.2(3)   | C00T | C00R | C00K | 120.2(3) |
| C00I | C00C | N005 | 119.0(3)   | C00N | C00S | C00M | 120.4(3) |
| C00I | C00C | C006 | 120.8(3)   | C00R | C00T | C00P | 120.5(3) |
| N005 | C00D | C00G | 108.9(3)   | C00X | C00U | C00G | 119.3(3) |
| N005 | C00D | C00Q | 128.9(3)   | C00Q | C00V | C00X | 120.9(3) |
| C00Q | C00D | C00G | 122.2(3)   | C00Z | C00W | C00J | 119.3(3) |
| C00H | C00E | S004 | 124.4(2)   | C00U | C00X | C00V | 121.2(3) |
| C00H | C00E | C00N | 117.8(3)   | C00L | C00Y | C00Z | 121.2(4) |
| C00N | C00E | S004 | 117.6(2)   | C00W | C00Z | C00Y | 121.2(3) |
| N005 | C00F | C00J | 108.3(3)   |      |      |      |          |

## 4. UV-Vis Analysis and Thermogravimetry

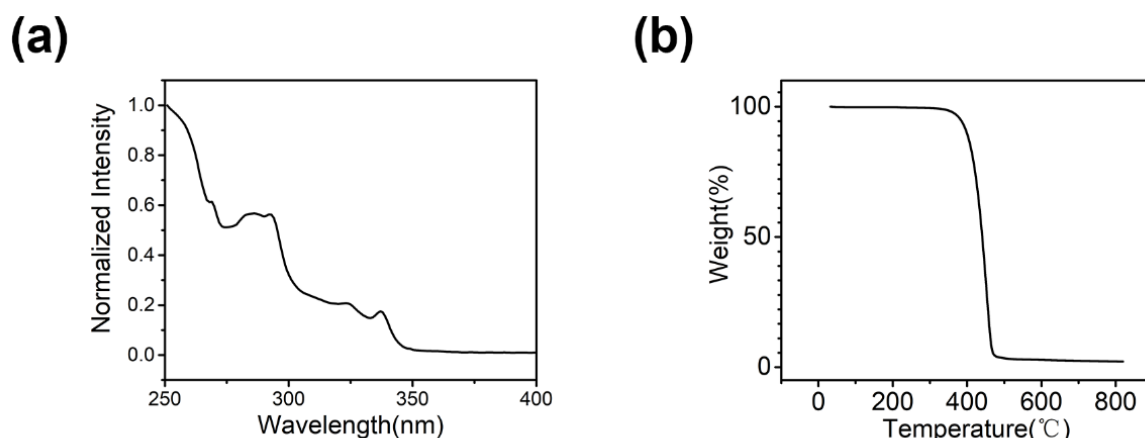

**Figure S3** (a) UV-vis absorption spectrum of **BrDBTCz** in 2-MeTHF solution; (b) TGA curve of **BrDBTCz**.

## 5. Photophysical Properties

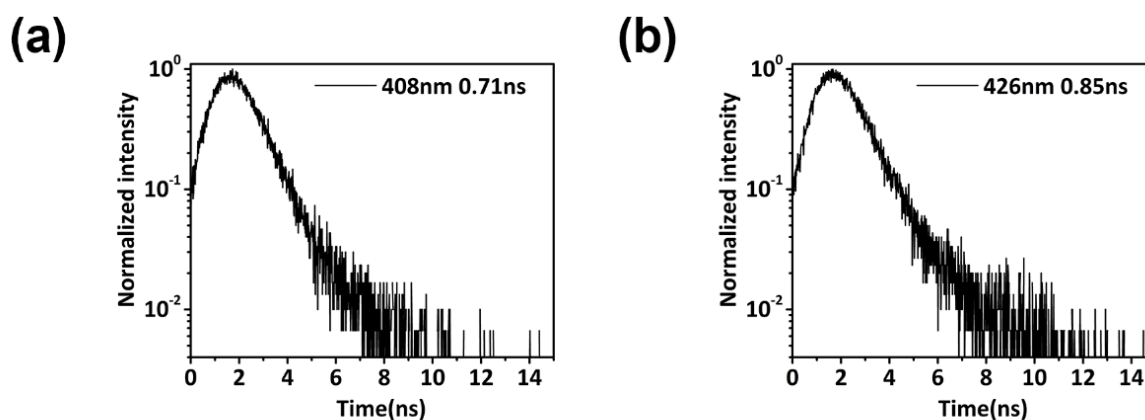

**Figure S4** Time-resolved fluorescence decay curves of crystalline **BrDBTCz** at 298K.

**Table S4** Photoluminescence lifetimes and percentages (A) of crystalline **BrDBTCz** under ambient conditions

| Fluorescence   |               | Room Temperature Phosphorescence |               |                    |               |                    |
|----------------|---------------|----------------------------------|---------------|--------------------|---------------|--------------------|
| Wavelength(nm) | $\tau_1$ (ns) | Wavelength(nm)                   | $\tau_1$ (ms) | A <sub>1</sub> (%) | $\tau_2$ (ms) | A <sub>2</sub> (%) |
| 408            | 0.71          | 550                              | 89.5          | 41.3               | 367           | 58.7               |
| 426            | 0.85          | 596                              | 82.6          | 47.9               | 343           | 52.1               |
|                |               | 650                              | 75.1          | 67.5               | 322           | 32.5               |

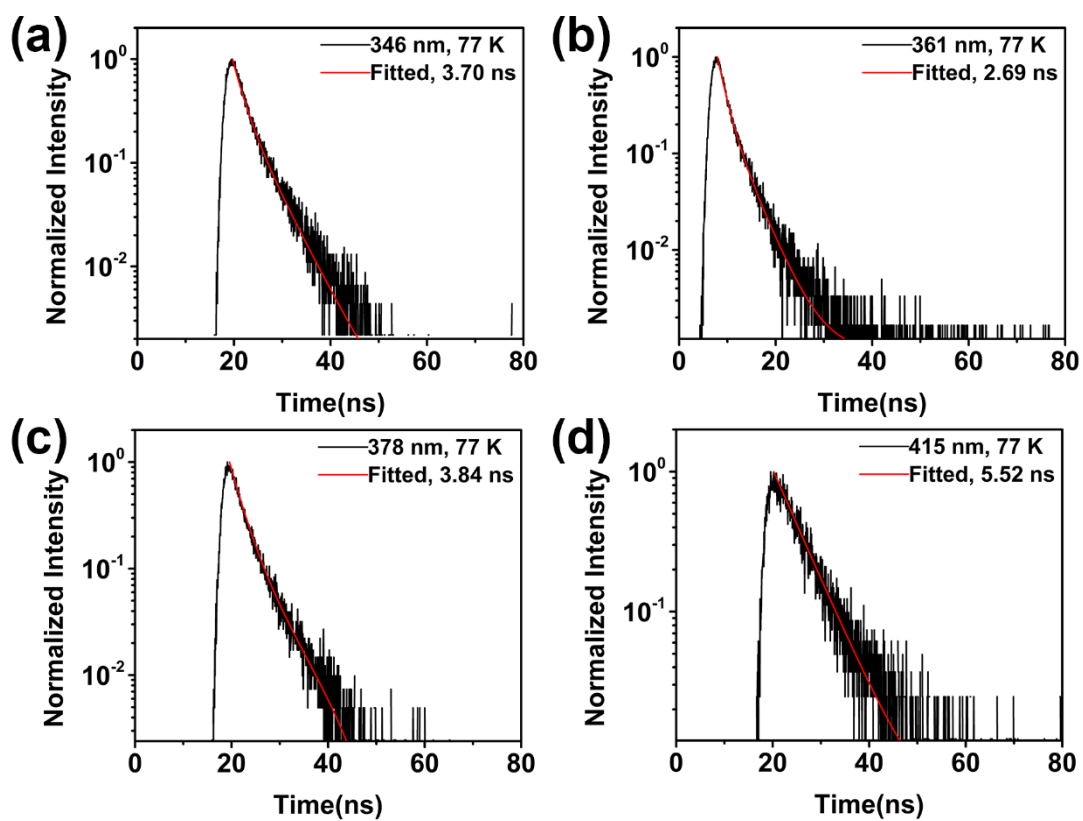

Figure S5 Time-resolved emission decay curves of BrDBTCz in a diluted 2-MeTHF solution at 77 K.



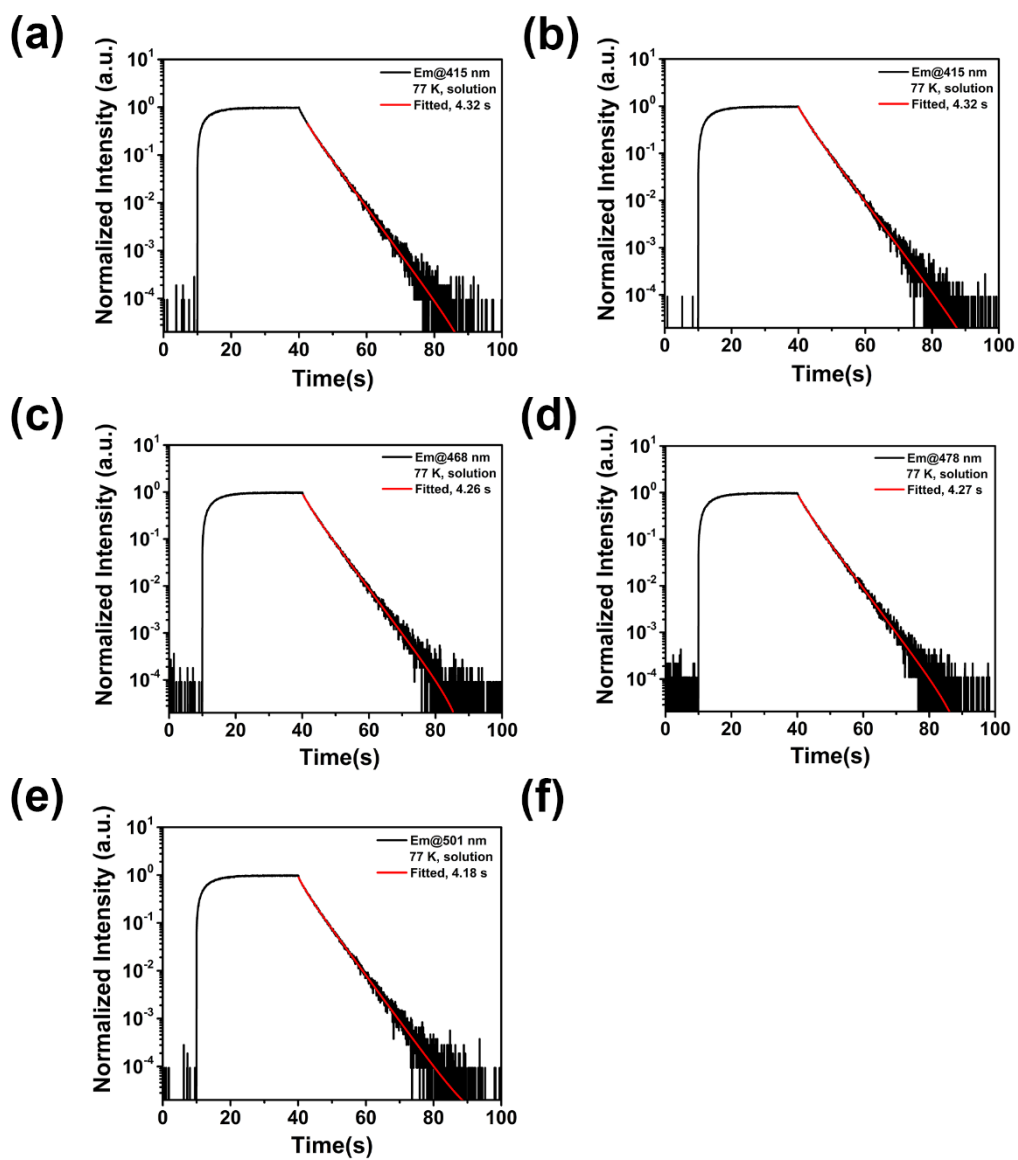

Figure S6 Phosphorescence decay curves at 77 K of BrDBTCz in diluted 2-MeTHF solution.

**Table S5** Photoluminescence lifetimes of **BrDBTCz** in the solution of 2-MeTHF at 77 K

| Wavelength<br>(nm) | Flourescence  |           |               |           | Ultralong Phosphorescncce |           |              |           |
|--------------------|---------------|-----------|---------------|-----------|---------------------------|-----------|--------------|-----------|
|                    | $\tau_1$ (ns) | $A_1$ (%) | $\tau_2$ (ns) | $A_2$ (%) | $\tau_1$ (s)              | $A_1$ (%) | $\tau_2$ (s) | $A_2$ (%) |
| 346                | 1.98          | 39.7      | 4.83          | 60.3      |                           |           |              |           |
| 361                | 1.48          | 46.7      | 3.75          | 53.3      |                           |           |              |           |
| 378                | 2.34          | 58.1      | 5.92          | 41.9      |                           |           |              |           |
| 415                | 5.52          | 100       | —             | —         | 1.69                      | 5.9       | 4.49         | 94.1      |
| 444                |               |           |               |           | 1.89                      | 11.1      | 4.57         | 88.9      |
| 468                |               |           |               |           | 1.89                      | 11.2      | 4.56         | 88.8      |
| 478                |               |           |               |           | 1.9                       | 11.3      | 4.57         | 88.7      |
| 501                |               |           |               |           | 1.7                       | 11.8      | 4.51         | 88.2      |

**Table S6** Photophysical parameters of crystalline **BrDBTCz** under the excitation of 400 nm at 298 K

| $\Phi_{\text{total}}$ (a)<br>(%) | Fluorescence               |                     |                                             |                                                | Phosphorescence            |                     |                                |                                   |                                                            |
|----------------------------------|----------------------------|---------------------|---------------------------------------------|------------------------------------------------|----------------------------|---------------------|--------------------------------|-----------------------------------|------------------------------------------------------------|
|                                  | $\bar{\tau}_F$ (b)<br>(ns) | $\Phi_F$ (c)<br>(%) | $k_r^F$<br>( $\times 10^7 \text{ s}^{-1}$ ) | $k_{nr}^F$<br>( $\times 10^7 \text{ s}^{-1}$ ) | $\bar{\tau}_P$ (d)<br>(ms) | $\Phi_P$ (e)<br>(%) | $k_r^P$<br>( $\text{s}^{-1}$ ) | $k_{nr}^P$<br>( $\text{s}^{-1}$ ) | $k_{\text{ISC}}^{(1)}$<br>( $\times 10^7 \text{ s}^{-1}$ ) |
| 21.51                            | 0.63                       | 2.51                | 3.98                                        | 124.59                                         | 209                        | 19.00               | 0.91                           | 3.87                              | 30.16                                                      |

(a) Absolute photoluminescence quantum yield from 385–660 nm;

(b) Algorithmic average lifetime value of all the main fluorescent emission peaks;

(c)  $\Phi_F = \Phi_{\text{total}} - \Phi_P$ 

(d) Algorithmic average lifetime value of all the main phosphorescent emission peaks;

(e) photoluminescence quantum yield from 500–660 nm;

Note (1) Reference: Zhao, W., et al. Boosting the efficiency of organic persistent room-temperature phosphorescence by intramolecular triplet-triplet energy transfer, *Nat. Commun.*, **2019**, *10*, 1595–1603.

$$k_r^F = \Phi_F / \tau_F; k_{nr}^F = (1 - \Phi_F - \Phi_P) / \tau_F;$$

$$k_r^P = \Phi_P / \tau_P; k_{nr}^P = (1 - \Phi_P) / \tau_P$$

$$k_{\text{ISC}} = \Phi_P / \tau_F$$

## 6. Data for reference compound

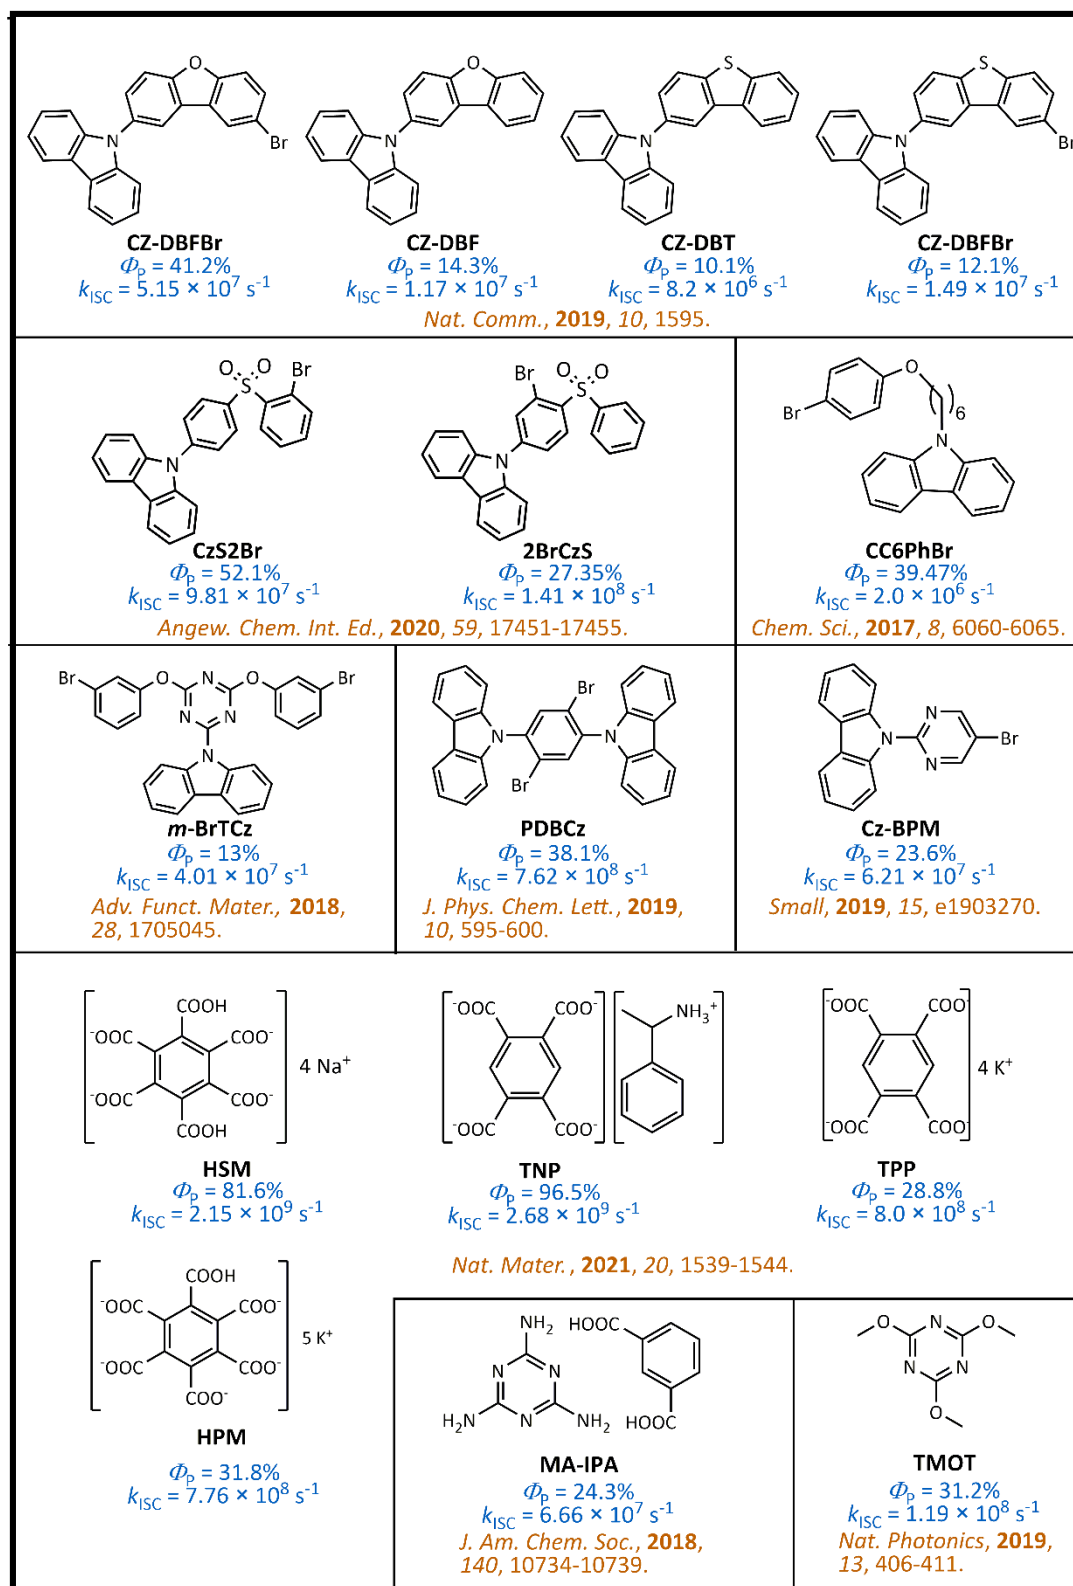

**Figure S7** A list of the reported non-doped pure organic phosphors with phosphorescent quantum yield over 10%, in which the phosphorescent quantum yield ( $\Phi_p$ ), intersystem crossing constant ( $k_{ISC}$ ) and the reference of each molecule was noted underneath, correspondingly

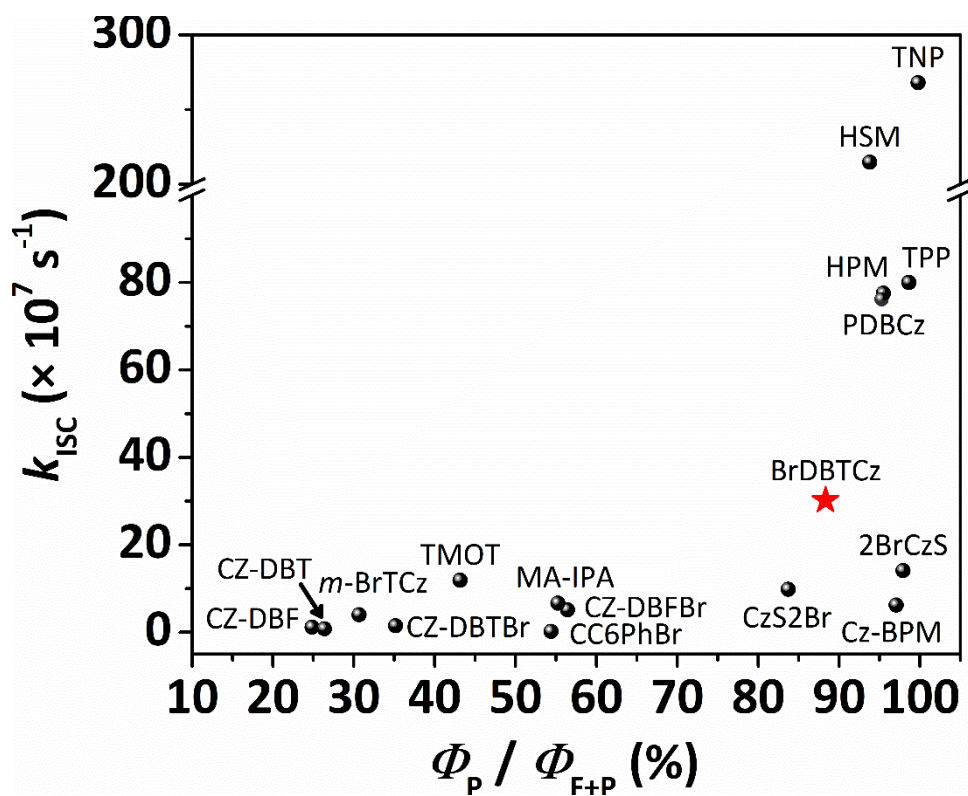

**Figure S8** The diagram of the reported non-doped pure organic phosphors with phosphorescent quantum yield over 10%, in which the names are identical to that in **Figure S7**.

## 7. Theoretical Calculation

(a)

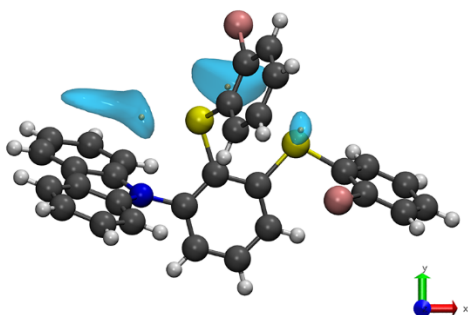

(b)

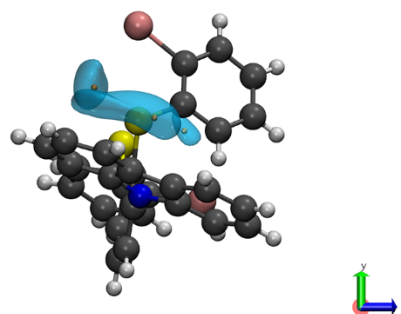

(c)

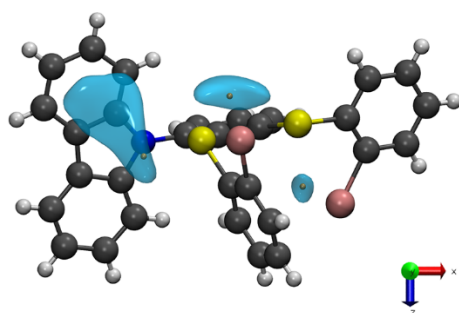

(d)

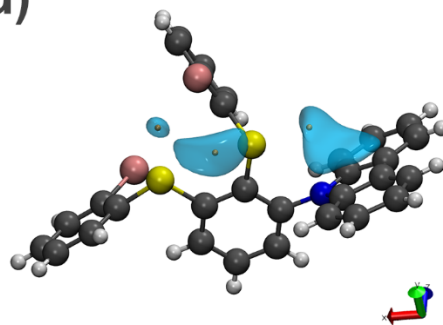

**Figure S9** The molecular electro-static potential (MESP) isosurface painted in blue translucent block visualizes the lone pair regions of sulphur atoms (with  $\pi$  electrons from carbazole group), in which the brown point inside the block indicated the attractor (minimum point). The isovalue for the surface is 0.09 atom unit (a.u.) higher than the minimum ESP value. Axes colouring in red, green and blue represent x, y and z axis, respectively

**Table S7** Frontier orbitals (HOMO: blue, LUMO: orange), and electron (green) / hole (purple) densities of excited states  $S_1$  and  $T_1$  for single **BrDBTCz** molecule and its six dimers, with  $\Delta E_{ST}$  and

|                 | Ground State ( $S_0$ )                                                              | The Lowest Excited Singlet State ( $S_1$ )                                          | The Lowest Excited Triplet State ( $T_1$ )                                           | $\Delta E_{ST}$ / eV | $\mu^2$ ( $T_1 \rightarrow S_0$ ) |
|-----------------|-------------------------------------------------------------------------------------|-------------------------------------------------------------------------------------|--------------------------------------------------------------------------------------|----------------------|-----------------------------------|
| Single Molecule |    |    |    | 0.58                 | 20.95                             |
| Dimer 1         |    |    |    | 0.53                 | 167.04                            |
| Dimer 2         |    |    |   | 0.71                 | 3027.13                           |
| Dimer 3         |   |   |   | 0.50                 | 21.21                             |
| Dimer 4         |  |  |  | 0.61                 | 18.30                             |
| Dimer 5         |  |  |  | 0.54                 | 40.89                             |
| Dimer 6         |  |  |  | 0.55                 | 25.11                             |

SOC coefficient( $\xi$ ) listed correspondingly.

**Table S8** Energy level of HOMO, LUMO and their bandgap of monomer and dimer **BrDBTCz**

|              | Monomer | Dimer 1 | Dimer 2 | Dimer 3 | Dimer 4 | Dimer 5 | Dimer 6 |
|--------------|---------|---------|---------|---------|---------|---------|---------|
| HOMO (eV)    | -5.5511 | -5.5124 | -5.5857 | -5.3853 | -5.6041 | -5.7150 | -5.4592 |
| LUMO (eV)    | -1.3126 | -1.3622 | -1.2107 | -1.3909 | -1.3151 | -1.4326 | -1.2635 |
| Bandgap (eV) | 4.2385  | 4.1502  | 4.3750  | 3.9944  | 4.2890  | 4.2824  | 4.1957  |

**Table S9** Component analysis of the excited-state **BrDBTCz** monomer

| State | No. | Energy (eV)                                | Transition Contributions (%) <sup>a</sup>                                                                                                                                              | $\xi_{T_n-S_1}$<br>(cm <sup>-1</sup> ) |
|-------|-----|--------------------------------------------|----------------------------------------------------------------------------------------------------------------------------------------------------------------------------------------|----------------------------------------|
| $S_n$ | 1   | 3.7333                                     | H→L+1(89.00%), H→L+2(5.93%)                                                                                                                                                            | --                                     |
|       | 2   | 3.8389                                     | H→L(89.78%), H→L+4(3.48%)                                                                                                                                                              |                                        |
|       | 3   | 4.0020                                     | H→L+3(64.43%), H-2→L(10.44%), H-3→L(7.84%),<br>H-1→L(6.71%)                                                                                                                            |                                        |
|       | 4   | 4.0193                                     | H-2→L(27.19%), H→L+3(22.45%), H-3→L(17.24%),<br>H-1→L(10.58%), H→L+4(8.61%), H-1→L+1(6.98%)                                                                                            |                                        |
|       | 5   | 4.0490                                     | H-1→L+1(58.45%), H-2→L+1(9.94%), H→L+4(8.34%),<br>H-2→L(4.25%), H-1→L(3.59%), H-1→L+2(3.36%), H→L(3.22%)                                                                               |                                        |
| $T_n$ | 1   | 3.1554                                     | H-1→L+3(57.01%), H-1→L+4(19.00%), H→L+9(6.37%)                                                                                                                                         | 0.45                                   |
|       | 2   | 3.3038                                     | H-2→L+1(36.24%), H-2→L+2(8.81%), H-3→L+4(7.72%),<br>H-3→L+5(3.68%), H-3→L(3.48%), H→L+3(3.48%)                                                                                         | 1.77                                   |
|       | 3   | 3.3611                                     | H→L+3(70.12%), H→L+4(16.28%)                                                                                                                                                           | 0.98                                   |
|       | 4   | 3.5060                                     | H-2→L+5(18.39%), H-2→L(8.29%), H-3→L+1(7.60%),<br>H-4→L+6(5.83%), H-3→L+6(4.74%), H-4→L+5(4.67%),<br>H-4→L+4(3.90%), H-7→L+5(3.74%), H-2→L+1(3.59%),<br>H-2→L+6(3.53%), H-4→L+7(3.38%) | 0.90                                   |
|       | 5   | 3.5727                                     | H-3→L(27.31%), H-9→L(16.65%), H-6→L+2(9.10%),<br>H-2→L(8.58%), H-6→L(8.19%), H-6→L+1(4.07%)                                                                                            | 1.11                                   |
|       | 6   | 3.6597<br>( $\Delta E_{S_{1T_n}}=0.0736$ ) | H→L+1(73.01%), H→L+4(9.11%), H-3→L+1(4.69%),<br>H→L+2(4.14%)                                                                                                                           | 1.33                                   |
|       | 7   | 3.7773<br>( $\Delta E_{S_{1T_n}}=0.0440$ ) | H→L(39.80%), H-2→L+1(12.23%), H→L+4(7.36%),<br>H→L+1(6.92%), H-3→L+4(3.94%), H-2→L+4(3.10%)                                                                                            | 4.74                                   |
|       | 8   | 3.8754                                     | H→L(47.20%), H-2→L+1(9.94%), H-2→L+4(9.76%),<br>H-3→L+4(9.70%), H-2→L+3(4.11%)                                                                                                         | 2.74                                   |
|       | 9   | 3.9758                                     | H-3→L+1(43.80%), H-2→L(10.43%), H→L+4(6.60%),<br>H-1→L(4.06%), H-6→L+1(3.05%)                                                                                                          | 3.40                                   |
|       | 10  | 3.9924                                     | H→L+4(16.90%), H-3→L+1(12.75%), H-2→L(9.39%),<br>H-2→L+4(5.80%), H-1→L(5.36%), H-3→L(4.57%),<br>H→L+3(4.54%), H-6→L+2(4.44%), H→L+1(3.97%),<br>H-2→L+3(3.32%)                          | 2.40                                   |

<sup>a</sup> H: HOMO ; L: LUMO

**Table S10** Component analysis of the excited-state **BrDBTCz** configured as dimer 1

| State | No. | Energy (eV) | Transition Contributions (%) <sup>a</sup>                                                                                                                | $\xi_{Tn-S1}$<br>( $\text{cm}^{-1}$ ) |
|-------|-----|-------------|----------------------------------------------------------------------------------------------------------------------------------------------------------|---------------------------------------|
| $S_n$ | 1   | 3.6588      | H-1→L+2(50.00%), H-1→L+1(39.07%), H-1→L+4(4.84%),<br>H-1→L+5(3.36%)                                                                                      | --                                    |
|       | 2   | 3.6747      | H-1→L+1(48.91%), H-1→L+2(36.69%), H-1→L(9.83%)                                                                                                           |                                       |
|       | 3   | 3.7514      | H→L+3(91.75%), H→L+9(3.14%)                                                                                                                              |                                       |
|       | 4   | 3.7744      | H-1→L(78.65%), H-1→L+1(6.07%), H-1→L+5(4.85%),<br>H-1→L+2(4.42%)                                                                                         |                                       |
|       | 5   | 3.8845      | H→L+1(51.69%), H→L+2(27.35%), H→L(3.19%)                                                                                                                 |                                       |
|       | 6   | 3.9206      | H-3→L+1(37.29%), H-3→L+2(18.75%), H-2→L+1(16.22%),<br>H-2→L+2(8.37%), H-3→L(4.61%), H-1→L+3(3.12%)                                                       |                                       |
|       | 7   | 3.9473      | H-1→L+3(48.97%), H-1→L+5(25.30%), H-1→L+7(3.94%),<br>H-3→L+1(3.61%), H-1→L(3.23%)                                                                        |                                       |
|       | 8   | 3.9762      | H-3→L+2(37.90%), H-1→L+3(13.52%), H-3→L+1(13.50%),<br>H-2→L+2(12.93%), H-2→L+1(5.25%)                                                                    |                                       |
|       | 9   | 3.9834      | H-1→L+5(28.97%), H-1→L+3(12.40%), H-3→L(8.28%),<br>H-5→L(6.88%), H-3→L+1(6.58%), H-7→L(5.86%),<br>H-3→L+2(5.25%), H-2→L+2(3.50%)                         |                                       |
|       | 10  | 3.9955      | H→L(91.80%), H→L+6(3.02%)                                                                                                                                |                                       |
| $T_n$ | 1   | 3.1273      | H-3→L+8(21.27%), H-3→L+7(13.55%), H-3→L+1(9.47%),<br>H-3→L+2(8.27%), H-2→L+8(7.37%), H-1→L+18(4.90%),<br>H-2→L+7(4.73%), H-2→L+1(3.31%)                  | 0.44                                  |
|       | 2   | 3.1558      | H-2→L+6(40.39%), H-3→L+6(14.63%), H-2→L+8(7.71%),<br>H→L+19(5.44%), H-2→L+9(5.13%)                                                                       | 0.00                                  |
|       | 3   | 3.2888      | H-5→L+2(12.75%), H-5→L+1(11.20%), H-1→L+2(11.09%),<br>H-7→L+5(6.42%), H-5→L+4(5.72%), H-1→L+1(5.37%),<br>H-1→L+8(5.18%), H-1→L+7(4.55%), H-1→L+5(3.29%)  | 1.57                                  |
|       | 4   | 3.3011      | H-4→L+3(34.83%), H-4→L+7(6.49%), H-6→L+9(3.41%)                                                                                                          | 0.40                                  |
|       | 5   | 3.3135      | H-1→L+8(16.91%), H-1→L+2(15.29%), H-1→L+1(12.34%),<br>H-1→L+7(11.74%), H-5→L+1(5.37%), H-5→L+2(4.68%),<br>H-4→L+3(3.30%)                                 | 0.92                                  |
|       | 6   | 3.3576      | H→L+6(66.98%), H→L+8(10.64%), H→L+9(5.22%),<br>H→L+7(4.15%)                                                                                              | 0.00                                  |
|       | 7   | 3.4994      | H-6→L+3(12.28%), H-4→L+11(11.81%), H-6→L+11(5.96%),<br>H-6→L+13(5.77%), H-9→L+13(4.81%), H-4→L+1(3.73%),<br>H-6→L+6(3.51%), H-8→L+13(3.03%)              | 0.09                                  |
|       | 8   | 3.5038      | H-5→L+10(15.57%), H-5→L(7.37%), H-7→L+12(4.22%),<br>H-5→L+12(4.12%), H-7→L+1(3.90%), H-8→L+10(3.17%),<br>H-8→L+12(3.14%), H-5→L+1(3.03%), H-7→L+2(3.02%) | 0.89                                  |



| State          | No. | Energy (eV)                              | Transition Contributions (%) <sup>a</sup>                                                                                                | $\xi_{T_n-S_1}$<br>(cm <sup>-1</sup> ) |
|----------------|-----|------------------------------------------|------------------------------------------------------------------------------------------------------------------------------------------|----------------------------------------|
| T <sub>n</sub> | 9   | 3.5592                                   | H-6→L+1(9.89%), H-12→L+7(8.74%), H-4→L+1(7.63%),<br>H-6→L+2(6.60%), H-4→L+2(5.22%), H-12→L+9(5.22%),<br>H-16→L+1(3.40%), H-14→L+1(3.08%) | 0.08                                   |
|                | 10  | 3.5742                                   | H-7→L(27.59%), H-19→L(16.43%), H-13→L+4(8.84%),<br>H-13→L(8.09%), H-5→L(7.48%)                                                           | 0.72                                   |
|                | 11  | 3.5932<br>( $\Delta E_{S_1T_n}=0.0656$ ) | H-1→L+1(43.45%), H-1→L+2(35.84%), H-1→L+5(4.44%),<br>H-1→L+4(4.12%)                                                                      | 1.00                                   |
|                | 12  | 3.6665                                   | H→L+3(69.34%), H→L+9(8.02%), H-6→L+3(5.37%),<br>H-4→L+3(4.41%)                                                                           | 0.15                                   |
|                | 13  | 3.7066<br>( $\Delta E_{S_1T_n}=0.0478$ ) | H-1→L(49.48%), H-1→L+5(9.69%), H-1→L+1(6.30%),<br>H-1→L+8(5.63%), H-5→L+2(4.76%)                                                         | 4.57                                   |
|                | 14  | 3.7801                                   | H-4→L+3(15.62%), H→L+3(12.23%), H→L+1(8.59%),<br>H-1→L+3(5.64%), H-4→L+9(5.12%), H→L+2(4.12%),<br>H→L+7(3.75%)                           | 0.88                                   |
|                | 15  | 3.8175                                   | H-1→L+1(19.18%), H-1→L+2(17.89%), H-1→L+8(15.03%),<br>H-1→L+7(11.75%), H-1→L(11.14%)                                                     | 1.60                                   |
|                | 16  | 3.8404                                   | H-1→L(24.25%), H-7→L+5(13.72%), H-5→L+5(13.12%),<br>H-5→L+2(12.20%), H-1→L+5(5.02%), H-3→L+2(3.49%)                                      | 2.53                                   |
|                | 17  | 3.8913                                   | H→L+1(40.70%), H→L+2(22.28%), H-1→L+3(4.21%),<br>H-4→L+9(4.16%)                                                                          | 0.26                                   |
|                | 18  | 3.9114                                   | H-3→L+1(22.92%), H-2→L+1(10.71%), H-3→L+2(9.44%),<br>H-3→L(7.61%), H-1→L+18(6.37%), H-2→L+2(4.63%),<br>H-2→L(3.06%)                      | 0.83                                   |
|                | 19  | 3.9347                                   | H-1→L+3(31.03%), H-1→L+5(17.16%), H-1→L+9(4.33%),<br>H-6→L+3(3.86%)                                                                      | 0.98                                   |
|                | 20  | 3.9532                                   | H-1→L+5(20.17%), H-6→L+3(9.12%), H-3→L+1(7.17%),<br>H-2→L+1(5.92%), H-3→L+2(3.80%), H-5→L(3.78%),<br>H-5→L+5(3.30%)                      | 2.04                                   |

<sup>a</sup> H: HOMO ; L: LUMO

**Table S11** Component analysis of the excited-state **BrDBTCz** configured as dimer 2

| State | No.             | Energy (eV) | Transition Contributions (%) <sup>a</sup>                                                                                                       | $\xi_{Tn-S1}$<br>( $\text{cm}^{-1}$ ) |
|-------|-----------------|-------------|-------------------------------------------------------------------------------------------------------------------------------------------------|---------------------------------------|
| $S_n$ | 1               | 3.8670      | H→L+2(24.71%), H-1→L+2(24.30%), H→L+3(20.74%),<br>H-1→L+3(17.10%)                                                                               | --                                    |
|       | 1d <sup>b</sup> | 3.8674      | H→L+2(24.82%), H-1→L+2(23.83%), H-1→L+3(20.11%),<br>H→L+3(18.04%)                                                                               |                                       |
|       | 3               | 3.9503      | H→L+1(31.33%), H-1→L(26.81%), H→L(8.55%),<br>H-6→L(7.25%), H-7→L+1(4.95%), H-2→L+1(3.68%)                                                       |                                       |
|       | 4               | 3.9509      | H→L(32.32%), H-1→L+1(27.98%), H→L+1(7.45%),<br>H-6→L+1(6.88%), H-7→L(4.60%), H-2→L(3.67%)                                                       |                                       |
|       | 5               | 3.9940      | H-1→L+4(46.70%), H→L+5(41.41%)                                                                                                                  |                                       |
|       | 6               | 3.9956      | H→L+4(47.84%), H-1→L+5(39.06%)                                                                                                                  |                                       |
|       | 7               | 4.0297      | H-2→L(20.15%), H-1→L+1(18.34%), H-6→L+1(11.25%),<br>H-7→L(8.33%), H-5→L+1(7.25%), H-3→L+1(7.08%),<br>H-4→L(6.55%), H→L+9(3.93%), H-1→L+8(3.54%) |                                       |
|       | 8               | 4.0334      | H-1→L(19.85%), H-2→L+1(19.72%), H-6→L(11.05%),<br>H-7→L+1(8.53%), H-5→L(7.34%), H-4→L+1(6.84%),<br>H-3→L(6.59%), H-1→L+9(3.85%), H→L+8(3.58%)   |                                       |
|       | 9               | 4.0591      | H-2→L+2(41.08%), H-3→L+3(13.99%), H-5→L+3(12.76%),<br>H-4→L+2(11.23%)                                                                           |                                       |
|       | 10              | 4.0730      | H-2→L+3(29.20%), H-3→L+2(17.40%), H-5→L+2(16.63%),<br>H-1→L+1(9.10%), H-4→L+3(8.35%), H→L+3(3.20%)                                              |                                       |
| $T_n$ | 1               | 3.1575      | H-3→L+4(15.83%), H-2→L+5(11.92%), H-3→L+5(11.88%),<br>H-4→L+5(11.82%), H-4→L+4(7.68%), H-2→L+4(7.65%),<br>H-5→L+4(4.82%), H-5→L+5(3.54%)        | 0.09                                  |
|       | 1d <sup>b</sup> | 3.1578      | H-3→L+5(17.20%), H-3→L+4(11.01%), H-2→L+4(10.86%),<br>H-4→L+4(10.09%), H-2→L+5(8.17%), H-4→L+5(7.50%),<br>H-5→L+5(6.21%), H-5→L+4(4.04%)        | 0.41                                  |
|       | 3               | 3.2966      | H-5→L+2(10.04%), H-2→L+3(9.07%), H-7→L+9(6.43%),<br>H-4→L+3(6.19%), H-3→L+2(4.66%), H-6→L+8(3.67%)                                              | 1.90                                  |
|       | 4               | 3.2971      | H-2→L+2(10.23%), H-5→L+3(8.16%), H-4→L+2(7.42%),<br>H-6→L+9(6.32%), H-3→L+3(3.93%), H-7→L+8(3.73%)                                              | 0.82                                  |
|       | 5               | 3.3373      | H→L+5(40.84%), H-1→L+4(38.60%)                                                                                                                  | 0.64                                  |
|       | 6               | 3.3377      | H-1→L+5(40.72%), H→L+4(37.86%)                                                                                                                  | 0.26                                  |
|       | 7               | 3.4762      | H-8→L+10(7.57%), H-5→L+10(5.98%), H-2→L+13(5.70%),<br>H-8→L+8(5.35%), H-5→L+11(5.04%), H-4→L+13(4.82%),<br>H-9→L+15(4.28%), H-6→L+2(3.66%)      | 0.78                                  |
|       | 8               | 3.5107      | H-5→L+13(10.54%), H-8→L+15(5.63%), H-2→L+10(4.33%),<br>H-3→L+13(3.75%), H-9→L+10(3.55%), H-4→L+10(3.31%)                                        | 1.04                                  |
|       | 9               | 3.5675      | H-6→L+1(15.75%), H-7→L(15.29%), H-17→L(8.74%),<br>H-16→L+1(7.84%), H-13→L+7(4.22%), H-13→L(3.10%)                                               | 1.30                                  |

| State          | No. | Energy (eV)                             | Transition Contributions (%) <sup>a</sup>                                                                                                        | $\xi_{T_n-S1}$<br>(cm <sup>-1</sup> ) |
|----------------|-----|-----------------------------------------|--------------------------------------------------------------------------------------------------------------------------------------------------|---------------------------------------|
| T <sub>n</sub> | 10  | 3.5691                                  | H-7→L+1(14.97%), H-6→L(14.81%), H-17→L+1(8.48%),<br>H-16→L(7.78%), H-13→L+6(4.04%), H-13→L+1(3.13%)                                              | 1.00                                  |
|                | 11  | 3.7492                                  | H→L+2(19.33%), H-1→L+3(13.26%), H→L+8(5.79%),<br>H-6→L+3(5.30%), H-7→L+2(5.24%), H→L+3(4.77%),<br>H-1→L+9(4.06%), H-1→L+2(3.97%)                 | 2.49                                  |
|                | 12  | 3.7497                                  | H→L+3(16.57%), H-1→L+2(15.97%), H-6→L+2(5.73%),<br>H-1→L+8(4.96%), H→L+2(4.77%), H-7→L+3(4.58%),<br>H→L+9(4.53%), H-1→L+3(3.98%), H-7→L+9(3.08%) | 1.09                                  |
|                | 13  | 3.8177<br>( $\Delta E_{S1T_n}=0.0493$ ) | H-1→L+2(16.47%), H→L+3(8.61%), H-2→L+3(6.75%),<br>H-7→L+9(5.93%), H-6→L+8(5.11%), H-5→L+2(4.71%),<br>H-4→L+3(3.89%), H-2→L+9(3.56%), H→L(3.19%)  | 2.47                                  |
|                | 14  | 3.8184<br>( $\Delta E_{S1T_n}=0.0486$ ) | H-1→L+3(14.34%), H→L+2(10.68%), H-2→L+2(7.25%),<br>H-6→L+9(6.82%), H-2→L+8(4.31%), H-4→L+2(4.19%),<br>H-5→L+3(4.08%), H-7→L+8(3.52%)             | 1.34                                  |
|                | 15  | 3.9451                                  | H→L+1(19.69%), H-1→L(17.78%), H-7→L+2(7.51%),<br>H-6→L+3(6.44%), H→L(5.24%), H-2→L+8(3.34%)                                                      | 2.36                                  |
|                | 16  | 3.9456                                  | H→L(19.67%), H-1→L+1(17.49%), H-6→L+2(7.53%),<br>H-7→L+3(7.43%), H→L+1(4.53%)                                                                    | 1.02                                  |
|                | 17  | 3.9724                                  | H-6→L+2(17.23%), H-7→L+3(15.68%), H-1→L+1(14.69%),<br>H→L(9.61%), H-1→L(3.02%)                                                                   | 3.66                                  |
|                | 18  | 3.9730                                  | H-7→L+2(16.90%), H-6→L+3(15.18%), H-1→L(14.03%),<br>H→L+1(9.11%), H-2→L+1(3.60%), H-1→L+1(3.50%)                                                 | 1.23                                  |
|                | 19  | 4.0016                                  | H-2→L(16.43%), H-5→L+1(7.54%), H-3→L+1(6.38%),<br>H-4→L(5.58%), H-1→L+8(4.08%)                                                                   | 1.18                                  |
|                | 20  | 4.0065                                  | H-2→L+1(14.68%), H-5→L(6.65%), H-3→L(5.88%),<br>H-4→L+1(5.05%), H-1→L+9(4.39%), H→L+2(3.63%),<br>H-6→L(3.39%), H→L+1(3.10%)                      | 0.65                                  |

<sup>a</sup> H: HOMO ; L: LUMO

<sup>b</sup> 1d: Degenerated orbital or 1<sup>st</sup> excited state.

**Table S12** Component analysis of the excited-state **BrDBTCz** configured as dimer 3

| State | No.             | Energy (eV)                            | Transition Contributions (%) <sup>a</sup>                                                                                                                                      | $\xi_{Tn-S1}$<br>(cm <sup>-1</sup> ) |
|-------|-----------------|----------------------------------------|--------------------------------------------------------------------------------------------------------------------------------------------------------------------------------|--------------------------------------|
| $S_n$ | 1               | 3.6563                                 | H→L+3(83.77%), H→L+7(6.03%), H→L+1(3.16%)                                                                                                                                      | --                                   |
|       | 2               | 3.6921                                 | H-1→L+1(72.99%), H-1→L+2(14.73%), H-1→L+4(7.39%)                                                                                                                               |                                      |
|       | 3               | 3.7527                                 | H→L(96.77%)                                                                                                                                                                    |                                      |
|       | 4               | 3.7606                                 | H→L+2(60.74%), H→L+1(28.19%)                                                                                                                                                   |                                      |
|       | 5               | 3.7839                                 | H-1→L(92.15%)                                                                                                                                                                  |                                      |
|       | 6               | 3.8605                                 | H→L+1(58.30%), H→L+2(34.38%)                                                                                                                                                   |                                      |
|       | 7               | 3.9647                                 | H-2→L+3(24.40%), H-4→L+2(11.44%), H→L+8(10.75%),<br>H-2→L+2(10.28%), H-2→L(10.20%), H-2→L+1(9.14%),<br>H-6→L+2(5.93%), H-4→L+1(3.63%)                                          |                                      |
|       | 8               | 3.9726                                 | H-2→L(34.79%), H-2→L+3(20.63%), H→L+8(18.96%),<br>H-2→L+2(5.64%), H-4→L+2(5.60%), H-6→L+2(3.41%)                                                                               |                                      |
|       | 9               | 3.9814                                 | H-1→L+5(56.37%), H-3→L(10.31%), H-5→L(8.43%),<br>H-7→L(7.75%)                                                                                                                  |                                      |
|       | 10              | 3.9858                                 | H-2→L(50.48%), H-2→L+3(23.53%), H→L+8(13.14%)                                                                                                                                  |                                      |
| $T_n$ | 1               | 3.1542                                 | H-3→L+5(35.20%), H-3→L+6(28.56%), H-3→L+7(12.92%)                                                                                                                              | 0.00                                 |
|       | 1d <sup>b</sup> | 3.1559                                 | H-2→L+9(56.60%), H-2→L+8(16.97%), H→L+19(7.13%)                                                                                                                                | 0.52                                 |
|       | 3               | 3.3019                                 | H-4→L+3(33.13%), H-4→L+7(6.44%), H-6→L+8(5.81%),<br>H→L+8(4.89%), H-4→L+8(4.29%)                                                                                               | 2.40                                 |
|       | 4               | 3.3061                                 | H-5→L+1(23.30%), H-5→L+4(7.73%), H-6→L+1(5.24%),<br>H-5→L+2(5.24%), H-7→L+5(4.91%), H-1→L+5(4.71%),<br>H-7→L+10(3.62%), H-7→L+6(3.52%), H-7→L(3.44%)                           | 0.21                                 |
|       | 5               | 3.3625                                 | H→L+9(57.82%), H→L+8(23.79%)                                                                                                                                                   | 1.12                                 |
|       | 6               | 3.3652                                 | H-1→L+5(46.14%), H-1→L+6(27.54%), H-1→L+7(12.18%)                                                                                                                              | 0.02                                 |
|       | 7               | 3.5022                                 | H-4→L+12(13.82%), H-4→L+2(7.08%), H-8→L+13(5.45%),<br>H-6→L+3(4.63%), H-8→L+8(4.37%), H-8→L+15(3.59%),<br>H-8→L+12(3.57%), H-4→L+3(3.52%), H-6→L+13(3.49%),<br>H-4→L+11(3.26%) | 0.79                                 |
|       | 8               | 3.5054                                 | H-5→L+10(12.43%), H-5→L(6.99%), H-7→L+1(5.67%),<br>H-10→L+10(4.29%), H-7→L+11(4.14%), H-10→L+11(4.00%),<br>H-5→L+11(3.75%), H-10→L+5(3.56%), H-10→L+14(3.52%)                  | 0.28                                 |
|       | 9               | 3.5639                                 | H-6→L+2(18.63%), H-17→L+2(13.85%), H-4→L+2(7.55%),<br>H-12→L+2(6.43%), H-12→L+7(5.53%), H-6→L+1(4.23%),<br>H-5→L+2(3.84%), H-12→L+3(3.71%), H-12→L+6(3.04%)                    | 1.25                                 |
|       | 10              | 3.5711                                 | H-7→L(27.42%), H-20→L(17.59%), H-13→L+4(8.45%),<br>H-13→L(8.20%), H-5→L(6.42%), H-13→L+1(3.58%)                                                                                | 0.08                                 |
|       | 11              | 3.5949<br>( $\Delta E_{S1Tn}=0.0614$ ) | H→L+3(70.05%), H→L+9(6.20%), H→L+7(4.86%),<br>H-6→L+3(3.60%)                                                                                                                   | 1.24                                 |
|       | 12              | 3.6270                                 | H-1→L+1(61.94%), H-1→L+2(12.80%), H-1→L+4(6.28%),<br>H-1→L+6(5.32%)                                                                                                            | 0.02                                 |

| State          | No. | Energy (eV)                              | Transition Contributions (%) <sup>a</sup>                                                                           | $\xi_{T_n-S_1}$<br>(cm <sup>-1</sup> ) |
|----------------|-----|------------------------------------------|---------------------------------------------------------------------------------------------------------------------|----------------------------------------|
| T <sub>n</sub> | 13  | 3.7243<br>( $\Delta E_{S_1T_n}=0.0680$ ) | H→L+2(41.81%), H→L+1(19.77%), H-4→L+3(6.88%),<br>H→L+8(6.37%), H→L+3(5.29%)                                         | 3.56                                   |
|                | 14  | 3.7434                                   | H-1→L(62.18%), H-1→L+5(4.72%), H-5→L+1(4.69%),<br>H-1→L+6(3.14%)                                                    | 0.13                                   |
|                | 15  | 3.7527                                   | H→L(98.76%)                                                                                                         | 2.61                                   |
|                | 16  | 3.8297                                   | H→L+2(29.51%), H-4→L+3(14.01%), H-4→L+8(8.80%),<br>H-6→L+8(7.02%), H-2→L+3(4.35%), H→L+8(4.22%)                     | 2.48                                   |
|                | 17  | 3.8549                                   | H-1→L(28.68%), H-5→L+1(9.52%), H-7→L+5(6.74%),<br>H-5→L+5(6.39%), H-7→L+6(4.87%), H-3→L+1(3.37%),<br>H-1→L+5(3.11%) | 0.93                                   |
|                | 18  | 3.8624                                   | H→L+1(66.66%), H→L+2(22.85%)                                                                                        | 3.11                                   |
|                | 19  | 3.9518                                   | H→L+8(16.94%), H-4→L+2(10.81%), H-6→L+3(10.37%),<br>H-2→L+2(9.22%), H→L+9(7.61%), H→L+1(3.99%),<br>H-2→L+1(3.90%)   | 2.65                                   |
|                | 20  | 3.9597                                   | H-2→L+3(23.93%), H-6→L+3(23.61%), H-4→L+8(6.44%),<br>H-5→L+3(6.17%), H-2→L(5.60%), H→L+8(3.84%),<br>H-2→L+1(3.43%)  | 2.63                                   |

<sup>a</sup> H: HOMO ; L: LUMO

<sup>b</sup> 1d: Degenerated orbital or 1<sup>st</sup> excited state.

**Table S13** Component analysis of the excited-state **BrDBTCz** configured as dimer 4

| State | No.             | Energy (eV) | Transition Contributions (%) <sup>a</sup>                                                                                                                                                                                                                                  | $\xi_{Tn-S1}$<br>( $\text{cm}^{-1}$ ) |
|-------|-----------------|-------------|----------------------------------------------------------------------------------------------------------------------------------------------------------------------------------------------------------------------------------------------------------------------------|---------------------------------------|
| $S_n$ | 1               | 3.7691      | H $\rightarrow$ L+2(46.16%), H-1 $\rightarrow$ L+3(42.47%)                                                                                                                                                                                                                 | --                                    |
|       | 1d <sup>b</sup> | 3.7709      | H-1 $\rightarrow$ L+2(45.09%), H $\rightarrow$ L+3(42.95%)                                                                                                                                                                                                                 |                                       |
|       | 3               | 3.8843      | H-1 $\rightarrow$ L(44.76%), H $\rightarrow$ L+1(38.74%), H $\rightarrow$ L(3.86%)                                                                                                                                                                                         |                                       |
|       | 4               | 3.8846      | H-1 $\rightarrow$ L+1(41.35%), H $\rightarrow$ L(38.12%), H $\rightarrow$ L+1(7.39%)                                                                                                                                                                                       |                                       |
|       | 5               | 3.9909      | H $\rightarrow$ L(29.37%), H-1 $\rightarrow$ L+1(20.87%), H-1 $\rightarrow$ L+5(19.02%),<br>H $\rightarrow$ L+4(15.09%), H $\rightarrow$ L+7(5.46%)                                                                                                                        |                                       |
|       | 6               | 3.9911      | H-1 $\rightarrow$ L(26.82%), H $\rightarrow$ L+1(21.10%), H $\rightarrow$ L+5(19.10%),<br>H-1 $\rightarrow$ L+4(15.89%), H-1 $\rightarrow$ L+7(5.26%), H-1 $\rightarrow$ L+1(3.12%)                                                                                        |                                       |
|       | 7               | 4.0114      | H $\rightarrow$ L(18.79%), H-1 $\rightarrow$ L+5(12.15%), H-1 $\rightarrow$ L(10.85%),<br>H $\rightarrow$ L+5(10.45%), H-1 $\rightarrow$ L+1(10.38%), H $\rightarrow$ L+4(9.62%),<br>H $\rightarrow$ L+1(6.87%), H-1 $\rightarrow$ L+4(4.94%), H $\rightarrow$ L+7(4.50%)  |                                       |
|       | 8               | 4.0115      | H $\rightarrow$ L+1(19.06%), H-1 $\rightarrow$ L+1(17.05%), H-1 $\rightarrow$ L+4(11.50%),<br>H $\rightarrow$ L+5(11.38%), H-1 $\rightarrow$ L(8.98%), H-1 $\rightarrow$ L+5(8.24%),<br>H $\rightarrow$ L+4(5.51%), H-1 $\rightarrow$ L+7(4.15%), H $\rightarrow$ L(3.40%) |                                       |
|       | 9               | 4.0281      | H-4 $\rightarrow$ L(19.27%), H-5 $\rightarrow$ L+1(18.56%), H-7 $\rightarrow$ L(12.30%),<br>H-6 $\rightarrow$ L+1(12.24%), H-2 $\rightarrow$ L+1(6.70%), H-3 $\rightarrow$ L(5.97%),<br>H $\rightarrow$ L+9(5.37%), H-1 $\rightarrow$ L+8(5.09%)                           |                                       |
|       | 10              | 4.0326      | H-4 $\rightarrow$ L+1(18.64%), H-5 $\rightarrow$ L(17.73%), H-7 $\rightarrow$ L+1(13.30%),<br>H-6 $\rightarrow$ L(12.82%), H-2 $\rightarrow$ L(6.82%), H-3 $\rightarrow$ L+1(5.73%), H-<br>1 $\rightarrow$ L+9(4.87%), H $\rightarrow$ L+8(4.48%)                          |                                       |
| $T_n$ | 1               | 3.1567      | H-2 $\rightarrow$ L+4(16.26%), H-2 $\rightarrow$ L+5(14.03%), H-3 $\rightarrow$ L+4(13.93%),<br>H-3 $\rightarrow$ L+5(12.00%), H-2 $\rightarrow$ L+7(3.35%)                                                                                                                | 0.28                                  |
|       | 1d <sup>b</sup> | 3.1573      | H-3 $\rightarrow$ L+5(16.40%), H-3 $\rightarrow$ L+4(14.10%), H-2 $\rightarrow$ L+5(13.74%),<br>H-2 $\rightarrow$ L+4(11.82%), H-3 $\rightarrow$ L+7(3.84%), H-2 $\rightarrow$ L+7(3.22%)                                                                                  | 0.35                                  |
|       | 3               | 3.3046      | H-4 $\rightarrow$ L+2(9.54%), H-5 $\rightarrow$ L+2(9.31%), H-5 $\rightarrow$ L+3(8.62%),<br>H-4 $\rightarrow$ L+3(8.41%), H-7 $\rightarrow$ L+9(3.07%)                                                                                                                    | 1.40                                  |
|       | 4               | 3.3048      | H-4 $\rightarrow$ L+3(9.85%), H-5 $\rightarrow$ L+3(9.23%), H-4 $\rightarrow$ L+2(8.45%),<br>H-5 $\rightarrow$ L+2(8.32%)                                                                                                                                                  | 1.16                                  |
|       | 5               | 3.3484      | H-1 $\rightarrow$ L+4(21.23%), H-1 $\rightarrow$ L+5(16.68%), H $\rightarrow$ L+4(16.05%),<br>H $\rightarrow$ L+5(14.10%), H-1 $\rightarrow$ L+7(3.98%), H-1 $\rightarrow$ L+6(3.78%),<br>H $\rightarrow$ L+6(3.17%)                                                       | 0.60                                  |
|       | 6               | 3.3487      | H $\rightarrow$ L+5(19.52%), H $\rightarrow$ L+4(18.42%), H-1 $\rightarrow$ L+5(16.28%),<br>H-1 $\rightarrow$ L+4(13.75%), H $\rightarrow$ L+7(4.56%), H-1 $\rightarrow$ L+7(3.43%),<br>H $\rightarrow$ L+6(3.25%)                                                         | 0.73                                  |
|       | 7               | 3.5070      | H-5 $\rightarrow$ L+11(5.67%), H-4 $\rightarrow$ L+10(5.45%), H-4 $\rightarrow$ L+11(4.15%),<br>H-5 $\rightarrow$ L+10(3.59%), H-4 $\rightarrow$ L(3.12%)                                                                                                                  | 0.51                                  |
|       | 8               | 3.5070      | H-4 $\rightarrow$ L+11(5.59%), H-5 $\rightarrow$ L+10(5.54%), H-4 $\rightarrow$ L+10(3.90%),<br>H-5 $\rightarrow$ L+11(3.84%), H-4 $\rightarrow$ L+1(3.06%)                                                                                                                | 0.77                                  |

| State          | No. | Energy (eV)                              | Transition Contributions (%) <sup>a</sup>                                                                                                  | $\xi_{T_n-S_1}$<br>( $\text{cm}^{-1}$ ) |
|----------------|-----|------------------------------------------|--------------------------------------------------------------------------------------------------------------------------------------------|-----------------------------------------|
| T <sub>n</sub> | 9   | 3.5751                                   | H-6→L(11.75%), H-7→L(6.91%), H-16→L(5.52%),<br>H-17→L(4.94%), H-6→L+1(4.85%), H-7→L+1(3.38%),<br>H-5→L(3.02%)                              | 0.80                                    |
|                | 10  | 3.5753                                   | H-7→L+1(11.33%), H-6→L+1(7.40%), H-17→L+1(6.10%),<br>H-7→L(5.27%), H-16→L+1(4.33%), H-5→L+1(3.11%)                                         | 1.03                                    |
|                | 11  | 3.6880<br>( $\Delta E_{S_1T_n}=0.0811$ ) | H→L+2(20.56%), H→L+3(18.39%), H-1→L+2(15.90%),<br>H-1→L+3(14.74%)                                                                          | 1.22                                    |
|                | 12  | 3.6882<br>( $\Delta E_{S_1T_n}=0.0809$ ) | H-1→L+3(20.42%), H-1→L+2(18.16%), H→L+3(16.65%),<br>H→L+2(14.29%)                                                                          | 1.00                                    |
|                | 13  | 3.7988<br>( $\Delta E_{S_1T_n}=0.0297$ ) | H→L+1(9.35%), H-1→L+1(6.66%), H-5→L+2(4.45%),<br>H-4→L+2(4.09%), H-4→L+3(3.86%), H→L(3.71%),<br>H-5→L+3(3.44%), H-1→L(3.28%), H→L+2(3.18%) | 3.53                                    |
|                | 14  | 3.7989<br>( $\Delta E_{S_1T_n}=0.0298$ ) | H-1→L(8.49%), H→L(7.52%), H-5→L+3(4.18%),<br>H-4→L+2(4.11%), H-1→L+1(4.11%), H-4→L+3(4.01%),<br>H-5→L+2(3.52%), H-1→L+3(3.08%)             | 2.83                                    |
|                | 15  | 3.9023                                   | H→L(23.16%), H-1→L(18.23%), H-1→L+1(14.56%),<br>H→L+1(3.99%), H-5→L+8(3.68%), H-6→L+8(3.43%),<br>H-4→L+9(3.26%)                            | 1.38                                    |
|                | 16  | 3.9023                                   | H→L+1(27.39%), H-1→L+1(13.48%), H-1→L(13.04%),<br>H→L(6.07%), H-5→L+9(3.67%), H-4→L+8(3.28%)                                               | 2.38                                    |
|                | 17  | 3.9803                                   | H-7→L+2(22.43%), H-6→L+3(15.52%), H-7→L+3(9.18%),<br>H-6→L+2(5.08%)                                                                        | 2.27                                    |
|                | 18  | 3.9804                                   | H-6→L+2(20.71%), H-7→L+3(16.52%), H-6→L+3(10.80%),<br>H-7→L+2(4.07%)                                                                       | 3.04                                    |
|                | 19  | 4.0005                                   | H-1→L(34.03%), H→L(28.01%), H→L+1(26.06%),<br>H-1→L+1(5.40%)                                                                               | 0.17                                    |
|                | 20  | 4.0009                                   | H-1→L+1(42.61%), H→L(22.34%), H→L+1(21.28%),<br>H-1→L(7.47%)                                                                               | 0.18                                    |

<sup>a</sup> H: HOMO ; L: LUMO

<sup>b</sup> 1d: Degenerated orbital or 1<sup>st</sup> excited state.

**Table S14** Component analysis of the excited-state **BrDBTCz** configured as dimer 5

| State          | No.             | Energy (eV) | Transition Contributions (%) <sup>a</sup>                                                                                                 | $\xi_{Tn-S1}$<br>(cm <sup>-1</sup> ) |
|----------------|-----------------|-------------|-------------------------------------------------------------------------------------------------------------------------------------------|--------------------------------------|
| S <sub>n</sub> | 1               | 3.6905      | H-1→L(47.39%), H→L+1(29.94%), H→L+3(10.99%),<br>H-1→L+2(6.18%)                                                                            | --                                   |
|                | 1d <sup>b</sup> | 3.6909      | H→L(47.94%), H-1→L+1(29.38%), H-1→L+3(11.03%),<br>H→L+2(6.14%)                                                                            |                                      |
|                | 3               | 3.9086      | H-1→L+1(18.25%), H→L(15.02%), H→L+1(14.92%),<br>H-1→L+3(6.79%), H-1→L(6.14%), H→L+3(5.88%),<br>H→L+4(5.88%), H→L+2(4.63%), H-1→L+7(3.02%) |                                      |
|                | 4               | 3.9089      | H→L+1(18.50%), H-1→L+1(15.02%), H-1→L(14.88%),<br>H→L+3(7.33%), H→L(6.04%), H-1→L+4(5.85%),<br>H-1→L+3(5.62%), H-1→L+2(4.31%)             |                                      |
|                | 5               | 3.9936      | H-3→L(34.99%), H-2→L+1(23.67%), H-2→L+3(7.94%),<br>H-2→L(7.88%), H-4→L(4.53%)                                                             |                                      |
|                | 6               | 3.9943      | H-2→L(33.36%), H-3→L+1(22.61%), H-3→L(7.82%),<br>H-3→L+3(7.62%), H-1→L+5(5.76%), H→L+4(4.06%),<br>H-5→L(3.31%)                            |                                      |
|                | 7               | 4.0110      | H→L+5(35.01%), H-1→L+4(30.94%), H→L+1(10.16%),<br>H-1→L+6(5.05%), H-1→L(4.31%)                                                            |                                      |
|                | 8               | 4.0137      | H-1→L+5(30.56%), H→L+4(29.43%), H-1→L+1(10.74%),<br>H→L(5.37%), H-3→L+1(4.48%), H→L+6(3.21%)                                              |                                      |
|                | 9               | 4.0337      | H→L+2(38.68%), H-1→L+3(34.26%), H→L(13.49%),<br>H-1→L+1(4.06%), H→L+6(3.50%)                                                              |                                      |
|                | 10              | 4.0351      | H-1→L+2(38.60%), H→L+3(35.55%), H-1→L(15.48%)                                                                                             |                                      |
| T <sub>n</sub> | 1               | 3.1520      | H-2→L+5(21.06%), H-2→L+6(15.64%), H-3→L+5(10.08%),<br>H-2→L+4(9.96%), H-3→L+6(7.47%), H-3→L+4(4.76%),<br>H-2→L+7(4.15%)                   | 0.32                                 |
|                | 1d <sup>b</sup> | 3.1528      | H-3→L+5(21.13%), H-3→L+6(16.07%), H-2→L+5(10.11%),<br>H-3→L+4(9.41%), H-2→L+6(7.68%), H-2→L+4(4.49%),<br>H-3→L+7(4.19%)                   | 0.30                                 |
|                | 3               | 3.2888      | H-4→L(15.31%), H-5→L+3(14.79%), H-5→L+1(4.64%),<br>H-4→L+4(3.36%), H-6→L+3(3.18%)                                                         | 1.79                                 |
|                | 4               | 3.2889      | H-5→L(15.05%), H-4→L+3(15.03%), H-4→L+1(4.64%),<br>H-5→L+4(3.26%), H-7→L+3(3.04%), H-6→L+4(3.02%)                                         | 0.60                                 |
|                | 5               | 3.3623      | H-1→L+5(23.32%), H→L+5(14.66%), H-1→L+6(13.23%),<br>H→L+6(10.83%), H-1→L+4(10.53%), H→L+4(8.54%)                                          | 0.62                                 |
|                | 6               | 3.3625      | H→L+5(23.43%), H-1→L+5(14.73%), H→L+6(13.68%),<br>H-1→L+6(11.11%), H→L+4(9.93%), H-1→L+4(8.14%)                                           | 0.59                                 |
|                | 7               | 3.5096      | H-5→L+10(4.68%), H-4→L+10(4.52%), H-4→L+11(4.17%),<br>H-5→L+11(3.91%)                                                                     | 0.74                                 |
|                | 8               | 3.5098      | H-4→L+10(4.68%), H-5→L+10(4.51%), H-5→L+11(4.19%),                                                                                        | 0.82                                 |



| State          | No.    | Energy (eV)                                                                     | Transition Contributions (%) <sup>a</sup>                                                                                                                                                      | $\xi_{T_n-S_1}$<br>( $\text{cm}^{-1}$ ) |
|----------------|--------|---------------------------------------------------------------------------------|------------------------------------------------------------------------------------------------------------------------------------------------------------------------------------------------|-----------------------------------------|
|                |        |                                                                                 | H-4→L+11(3.93%)                                                                                                                                                                                |                                         |
| T <sub>n</sub> | 9      | 3.5933                                                                          | H-6→L+1(12.44%), H-7→L+2(8.06%), H-13→L+9(7.40%),<br>H-16→L(6.85%), H-5→L+1(4.85%), H-12→L+8(4.84%),<br>H-17→L+1(4.33%), H-12→L+2(4.27%), H-16→L+2(3.48%),<br>H-17→L+3(3.47%)                  | 0.71                                    |
|                | 10     | 3.5957                                                                          | H-7→L+1(11.53%), H-6→L+2(10.01%), H-13→L+8(6.26%),<br>H-17→L(5.76%), H-12→L+9(5.71%), H-13→L+2(5.08%),<br>H-16→L+1(5.04%), H-4→L+1(4.73%), H-16→L+3(3.99%),<br>H-5→L+2(3.36%), H-17→L+2(3.08%) | 0.02                                    |
|                | 11     | 3.6241<br>( $\Delta E_{S_{1T_n}}=0.0664$ )                                      | H→L(33.21%), H-1→L+1(27.08%), H-1→L+3(8.50%),<br>H→L+2(6.91%), H-1→L+7(4.08%)                                                                                                                  | 0.22                                    |
|                | 12     | 3.6243<br>( $\Delta E_{S_{1T_n}}=0.0662$ )                                      | H-1→L(32.29%), H→L+1(27.48%), H→L+3(8.73%),<br>H-1→L+2(6.95%), H→L+7(4.16%)                                                                                                                    | 1.28                                    |
|                | 13     | 3.7600<br>( $\Delta E_{S_{1T_n}}=0.0695$ )                                      | H-1→L(11.18%), H-4→L(9.15%), H→L+3(7.61%),<br>H-5→L+1(7.17%), H-6→L+7(4.71%), H-1→L+4(4.36%),<br>H-6→L+1(4.23%), H-5→L+7(4.17%), H→L+7(3.17%)                                                  | 4.11                                    |
|                | 14     | 3.7618<br>( $\Delta E_{S_{1T_n}}=0.0713$ )                                      | H→L(10.59%), H-5→L(8.99%), H-1→L+3(7.69%),<br>H-4→L+1(7.26%), H-7→L+7(4.71%), H→L+4(4.63%),<br>H-4→L+7(4.39%), H-7→L+1(3.83%), H-1→L+7(3.04%)                                                  | 0.56                                    |
|                | 15     | 3.9061                                                                          | H→L+1(19.56%), H-1→L(12.47%), H→L+3(7.76%), H→L(4.37%),<br>H-5→L+7(3.62%), H-1→L+2(3.42%), H-1→L+1(3.01%),<br>H-4→L+4(3.00%)                                                                   | 1.67                                    |
|                | 16     | 3.9065                                                                          | H-1→L+1(20.22%), H→L(12.37%), H-1→L+3(7.69%),<br>H-1→L(4.32%), H-4→L+7(3.67%), H→L+2(3.60%),<br>H-1→L+7(3.01%)                                                                                 | 0.94                                    |
|                | 17     | 3.9318                                                                          | H-7→L(26.14%), H-6→L+1(16.14%), H-6→L+3(12.76%),<br>H-7→L+2(6.19%), H→L+1(3.79%)                                                                                                               | 3.42                                    |
|                | 18     | 3.9319                                                                          | H-6→L(27.51%), H-7→L+1(15.11%), H-7→L+3(13.21%),<br>H-6→L+2(5.89%), H-1→L+1(4.02%)                                                                                                             | 0.16                                    |
|                | 19     | 4.0052                                                                          | H-2→L(26.14%), H-2→L+1(13.93%), H-3→L(10.44%),<br>H-3→L+1(8.40%), H-2→L+3(4.01%)                                                                                                               | 0.43                                    |
| 20             | 4.0055 | H-3→L(26.35%), H-3→L+1(14.28%), H-2→L(9.80%),<br>H-2→L+1(8.15%), H-3→L+3(3.90%) | 0.39                                                                                                                                                                                           |                                         |

<sup>a</sup> H: HOMO ; L: LUMO

<sup>b</sup> 1d: Degenerated orbital or 1<sup>st</sup> excited state.

**Table S15** Component analysis of the excited-state **BrDBTCz** configured as dimer 6

| State          | No.             | Energy (eV) | Transition Contributions (%) <sup>a</sup>                                                                                                | $\xi_{Tn-S1}$<br>(cm <sup>-1</sup> ) |
|----------------|-----------------|-------------|------------------------------------------------------------------------------------------------------------------------------------------|--------------------------------------|
| S <sub>n</sub> | 1               | 3.7030      | H→L+2(45.79%), H-1→L+3(42.45%), H→L+4(3.62%)                                                                                             | --                                   |
|                | 1d <sup>b</sup> | 3.7046      | H-1→L+2(44.71%), H→L+3(43.67%), H-1→L+4(3.61%)                                                                                           |                                      |
|                | 3               | 3.8025      | H→L(50.52%), H-1→L+1(39.68%)                                                                                                             |                                      |
|                | 4               | 3.8032      | H→L+1(48.67%), H-1→L(41.35%)                                                                                                             |                                      |
|                | 5               | 3.8512      | H-1→L(46.18%), H→L+1(34.56%), H→L(11.54%),<br>H-1→L+1(6.96%)                                                                             |                                      |
|                | 6               | 3.8514      | H-1→L+1(47.18%), H→L(33.41%), H→L+1(12.21%),<br>H-1→L(6.42%)                                                                             |                                      |
|                | 7               | 3.9810      | H→L+3(38.39%), H-1→L+2(28.34%), H-1→L+6(12.25%),<br>H→L+7(9.17%)                                                                         |                                      |
|                | 8               | 3.9812      | H-1→L+3(42.39%), H→L+2(31.33%), H→L+6(9.74%),<br>H-1→L+7(6.73%)                                                                          |                                      |
|                | 9               | 3.9906      | H-1→L+6(23.97%), H→L+7(20.12%), H-1→L+2(19.44%),<br>H→L+3(10.30%), H-2→L+1(3.76%), H-4→L(3.18%),<br>H-5→L+1(3.10%)                       |                                      |
|                | 10              | 3.9916      | H→L+6(26.66%), H-1→L+7(21.40%), H→L+2(13.31%),<br>H-1→L+3(6.04%), H-2→L(5.58%), H-4→L+1(4.07%),<br>H-5→L(3.88%)                          |                                      |
| T <sub>n</sub> | 1               | 3.1535      | H-2→L+6(17.23%), H-3→L+8(16.36%), H-3→L+7(13.30%),<br>H-2→L+9(12.62%), H-3→L+6(4.57%), H-2→L+8(4.45%),<br>H-2→L+7(3.57%), H-3→L+9(3.29%) | 0.41                                 |
|                | 1d <sup>b</sup> | 3.1537      | H-3→L+6(16.73%), H-2→L+8(16.67%), H-2→L+7(13.70%),<br>H-3→L+9(12.43%), H-2→L+6(4.57%), H-3→L+8(4.27%),<br>H-3→L+7(3.56%), H-2→L+9(3.46%) | 0.17                                 |
|                | 3               | 3.3105      | H-4→L+3(10.93%), H-5→L+2(10.56%), H-4→L+2(7.18%),<br>H-5→L+3(6.54%), H-4→L+5(3.27%)                                                      | 1.24                                 |
|                | 4               | 3.3105      | H-5→L+3(10.78%), H-4→L+2(10.74%), H-5→L+2(6.99%),<br>H-4→L+3(6.75%), H-5→L+5(3.09%)                                                      | 0.99                                 |
|                | 5               | 3.3659      | H→L+6(21.14%), H-1→L+7(16.70%), H-1→L+8(15.26%),<br>H→L+9(11.17%), H-1→L+6(6.24%), H→L+7(5.26%),<br>H→L+8(4.87%), H-1→L+9(3.24%)         | 1.02                                 |
|                | 6               | 3.3662      | H-1→L+6(20.58%), H→L+7(17.17%), H→L+8(15.53%),<br>H-1→L+9(11.03%), H→L+6(6.24%), H-1→L+7(5.26%),<br>H-1→L+8(4.69%), H→L+9(3.40%)         | 0.51                                 |
|                | 7               | 3.5083      | H-4→L+10(8.98%), H-5→L+11(8.67%), H-4→L+1(4.16%),<br>H-5→L(3.91%), H-7→L+2(3.69%), H-6→L+3(3.68%)                                        | 0.57                                 |
|                | 8               | 3.5083      | H-4→L+11(8.87%), H-5→L+10(8.78%), H-4→L(4.16%),<br>H-5→L+1(3.95%), H-7→L+3(3.72%), H-6→L+2(3.66%)                                        | 0.58                                 |
|                | 9               | 3.5732      | H-7→L(7.81%), H-6→L(7.61%), H-6→L+1(5.69%),<br>H-18→L(5.64%), H-7→L+1(5.26%), H-19→L(4.77%),<br>H-18→L+1(3.76%), H-19→L+1(3.54%)         | 0.62                                 |

| State          | No. | Energy (eV)                              | Transition Contributions (%) <sup>a</sup>                                                                                                                                                     | $\xi_{T_n-S_1}$<br>(cm <sup>-1</sup> ) |
|----------------|-----|------------------------------------------|-----------------------------------------------------------------------------------------------------------------------------------------------------------------------------------------------|----------------------------------------|
| T <sub>n</sub> | 10  | 3.5733                                   | H-7→L+1(7.90%), H-6→L+1(7.57%), H-6→L(5.62%),<br>H-7→L(5.29%), H-18→L+1(5.18%), H-19→L+1(5.16%),<br>H-19→L(3.88%), H-18→L(3.50%)                                                              | 0.58                                   |
|                | 11  | 3.6368<br>( $\Delta E_{S_1T_n}=0.0662$ ) | H→L+3(19.82%), H-1→L+2(18.91%), H→L+2(18.59%),<br>H-1→L+3(17.80%)                                                                                                                             | 0.78                                   |
|                | 12  | 3.6369<br>( $\Delta E_{S_1T_n}=0.0661$ ) | H-1→L+3(19.37%), H→L+2(19.36%), H→L+3(18.47%),<br>H-1→L+2(17.94%)                                                                                                                             | 0.76                                   |
|                | 13  | 3.7578                                   | H→L(25.85%), H-1→L+1(18.46%), H-1→L(8.50%),<br>H→L+1(4.95%), H-5→L+2(3.19%), H-4→L+3(3.18%)                                                                                                   | 4.28                                   |
|                | 14  | 3.7580                                   | H→L+1(24.79%), H-1→L(19.42%), H-1→L+1(8.49%),<br>H→L(5.04%), H-4→L+2(3.23%), H-5→L+3(3.15%)                                                                                                   | 2.33                                   |
|                | 15  | 3.8511                                   | H→L(45.37%), H-1→L+1(33.18%), H-1→L(13.33%),<br>H→L+1(6.56%)                                                                                                                                  | 0.29                                   |
|                | 16  | 3.8512                                   | H→L+1(43.62%), H-1→L(35.74%), H-1→L+1(12.29%),<br>H→L(7.31%)                                                                                                                                  | 0.21                                   |
|                | 17  | 3.8652                                   | H-1→L(16.11%), H→L+1(11.93%), H-4→L+2(5.97%),<br>H-5→L+3(5.58%), H-5→L+7(3.63%), H-6→L+9(3.59%)                                                                                               | 1.43                                   |
|                | 18  | 3.8654                                   | H-1→L+1(20.21%), H→L(8.59%), H-5→L+2(5.79%),<br>H-4→L+3(5.59%), H-4→L+7(3.56%), H-7→L+9(3.51%),<br>H-5→L+9(3.03%)                                                                             | 2.50                                   |
|                | 19  | 3.9734                                   | H-2→L(7.66%), H→L+9(7.60%), H-1→L+8(7.24%),<br>H-5→L(7.01%), H-4→L+1(6.92%), H-6→L+3(5.32%),<br>H-7→L+2(5.27%), H→L+2(5.00%), H-1→L+7(4.58%),<br>H→L+6(4.29%), H-3→L+1(3.72%), H-1→L+3(3.18%) | 1.62                                   |
|                | 20  | 3.9738                                   | H-1→L+9(7.85%), H→L+8(7.75%), H-2→L+1(7.41%),<br>H-5→L+1(7.35%), H-4→L(7.16%), H-7→L+3(4.77%),<br>H-6→L+2(4.77%), H→L+7(4.74%), H-1→L+6(4.38%),<br>H-3→L(4.12%), H-1→L+2(4.12%)               | 0.09                                   |

<sup>a</sup> H: HOMO ; L: LUMO

<sup>b</sup> 1d: Degenerated orbital or 1<sup>st</sup> excited state.

## 8. High Performance Liquid Chromatography (HPLC)

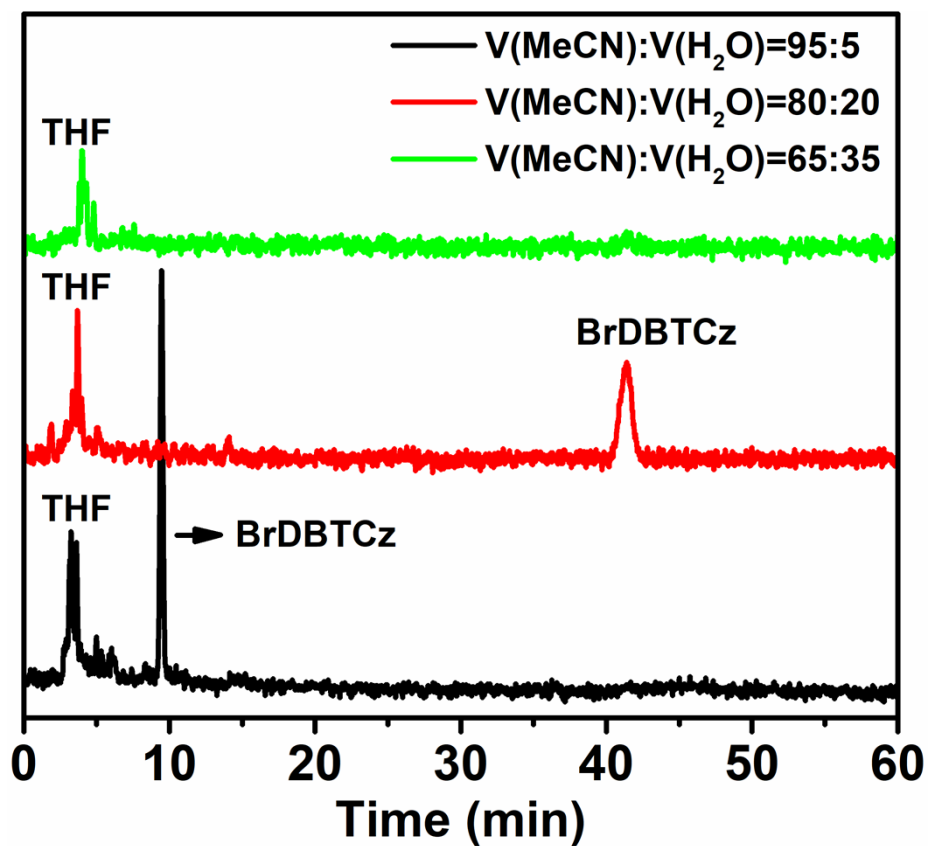

**Figure S10** The HPLC spectra of the THF-dissolved **BrDBTCz** monitored at 346 nm with the acetonitrile-water mixed eluent. Generally, 5 mg of **BrDBTCz** was dissolved in 5 mL of THF, 10  $\mu$ L of the solution was then added into the 1 mL of eluent with certain ratio.
